# Supplementary material for: Synthesis, activity and metabolic stability of propan-2-one substituted tetrazolylalkanoic acids as dual inhibitors of cytosolic phospholipase A2α and fatty acid amide hydrolase
Source: Royal Society of Chemistry journal article supplement (doi:10.1039/d3md00224a), 2023-01-01

## Supplementary Information

### Synthesis, activity and metabolic stability of propan-2-one substituted tetrazolylalkanoic acids as dual inhibitors of cytosolic phospholipase A<sub>2</sub> $\alpha$ and fatty acid amide hydrolase

*Merlin Ekodo Voundi, Walburga Hanekamp, Matthias Lehr\**

Institute of Pharmaceutical and Medicinal Chemistry, University of Münster,  
Corrensstrasse 48, 48149 Münster, Germany

\* Corresponding author. Tel.: +49251 83 33331; fax: +49251 83 32144;

*E-mail address:* lehrm@uni-muenster.de

#### Supplementary information content:

|                                                                                                                                                                            | Page |
|----------------------------------------------------------------------------------------------------------------------------------------------------------------------------|------|
| 1. Metabolism of compounds <b>10</b> and <b>12</b> by rat liver S9 fraction                                                                                                | 2    |
| 2. Spectra of the new target compounds <b>32</b> and <b>44</b>                                                                                                             | 8    |
| 3. <sup>1</sup> H and <sup>13</sup> C NMR spectra of the target compounds whose synthesis was already described in the patent applications DE102013016573 and WO2017093351 | 12   |

## 1. Metabolism of compounds 10 and 12 by rat liver S9 fraction

**Incubation procedure:** To a mixture of 125  $\mu$ L S9 fraction (prepared as described recently,<sup>32</sup> protein content 8 mg/mL) and 373  $\mu$ L of a NADPH-solution (11.2 mg NADPH- $\text{Na}_4$  in a mixture of 9.5 mL of potassium phosphate buffer (0.1 M, pH 7.4), which contained 0.5 mM EDTA- $\text{Na}_2$ , and 0.5 mL of a 0.1 M magnesium chloride solution) was added 2  $\mu$ L of a DMSO solution (5 mM) of the test compound (= parent compound). The final protein concentration in the sample was 2 mg/mL, the concentration of NADPH was 1 mM and the concentration of the parent compound was 20  $\mu$ M. After incubation at 37 °C for 30 min, 1.0 mL acetonitrile was added. The mixture was vortexed and allowed to stand in an ice bath for 15 min. After vigorous vortexing, the mixture was centrifuged at 12000 g and 4 °C for 5 min. The supernatant of the metabolism sample was separated and subjected to HPLC-MS.

A control sample, in which the enzymatic activity of the S9 fraction was inactivated before the addition of the test substance, was prepared as follows: A mixture of 125  $\mu$ L S9 fraction, 373  $\mu$ L of a 19:1 (v/v) mixture of potassium phosphate buffer (0.1 M, pH 7.4), which contained 0.5 mM EDTA- $\text{Na}_2$ , and a 0.1 M magnesium chloride solution, and 1.0 mL of acetonitrile was treated with 2  $\mu$ L of a DMSO solution (5 mM) of the test compound. This mixture was allowed to stand at room temperature for 30 min and in an ice bath for 15 min before centrifugation at 12000 g and 4 °C for 5 min. The supernatant was separated and subjected to HPLC-MS.

The extent of metabolism was determined by comparing the peak area of the test substance in the metabolism sample with that of the control sample.

**HPLC-MS analysis:** The HPLC/MS system used was from Shimadzu (Kyoto, Japan) and consisted of two LC-20ADXR HPLC-pumps, a SIL-30AC autosampler, and a LCMS-2020 single quad detector. Aliquots of 2  $\mu$ L were injected onto a HICHROM ACE 3 C<sub>18</sub> column (2.1 mm inside diameter x 100 mm, particle size 3  $\mu$ m) (HiChrom, Berkshire, UK) protected with a Phenomenex C18 guard column (3 mm inside diameter x 4 mm) (Phenomenex, Aschaffenburg, Germany). Autosampler temperature was 15 °C, column oven temperature was set to 30 °C. Gradient elution was used with solvent A (acetonitrile/water/formic acid, 10:90:0.1, v/v/v) and solvent B (acetonitrile/water/formic acid, 90:10:0.1, v/v/v): 0–3 min: isocratic run at 10% B, 3–15 min: linear gradient to 95% B, 15–18 min: isocratic run at 95% B, 18–20 min: linear gradient to 10% B, 20–28 min isocratic run at 10% B. Detection was performed in ESI negative mode. The effluents were directed to the mass spectrometer by a divert valve from minute 2.5 to minute 26.

# HPLC-MS-ESI (negative) chromatograms:

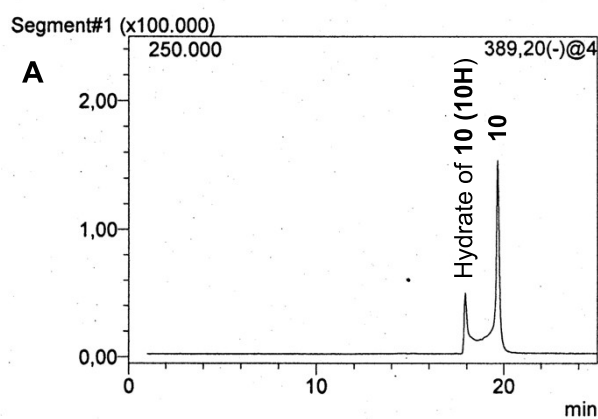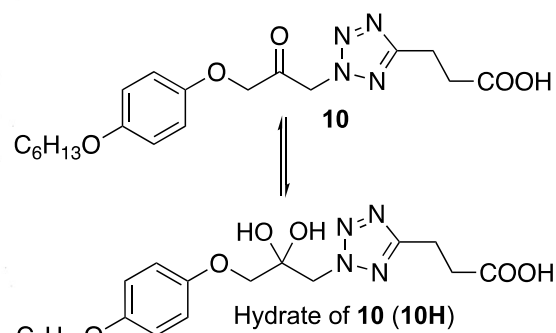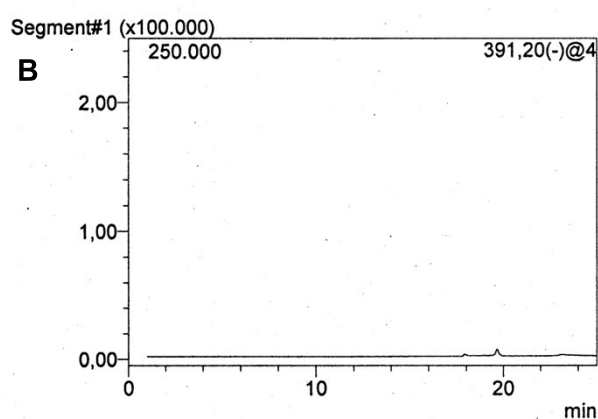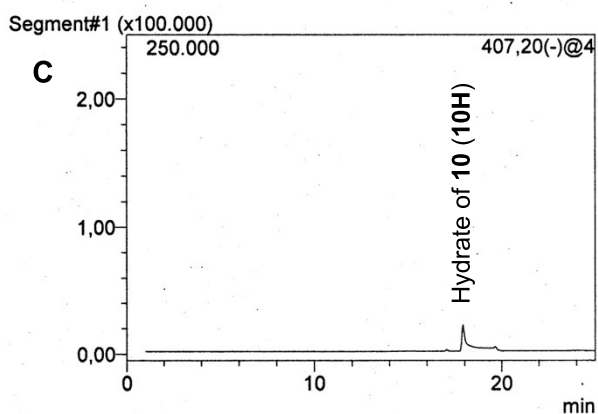

**Figure 1** HPLC-MS ESI negative-chromatograms (SIM mode) obtained when enzymatic activity of the S9 fraction was inactivated by acetonitrile before addition of the test compound **10**; (A) *m/z* trace of the parent compound **10**; (B) *m/z* trace of the metabolite of **10** formed by reduction of the ketone group to an alcohol and of the (M+2) isotope of **10**; (C) *m/z* trace of the hydrate form of **10** (**10H**).

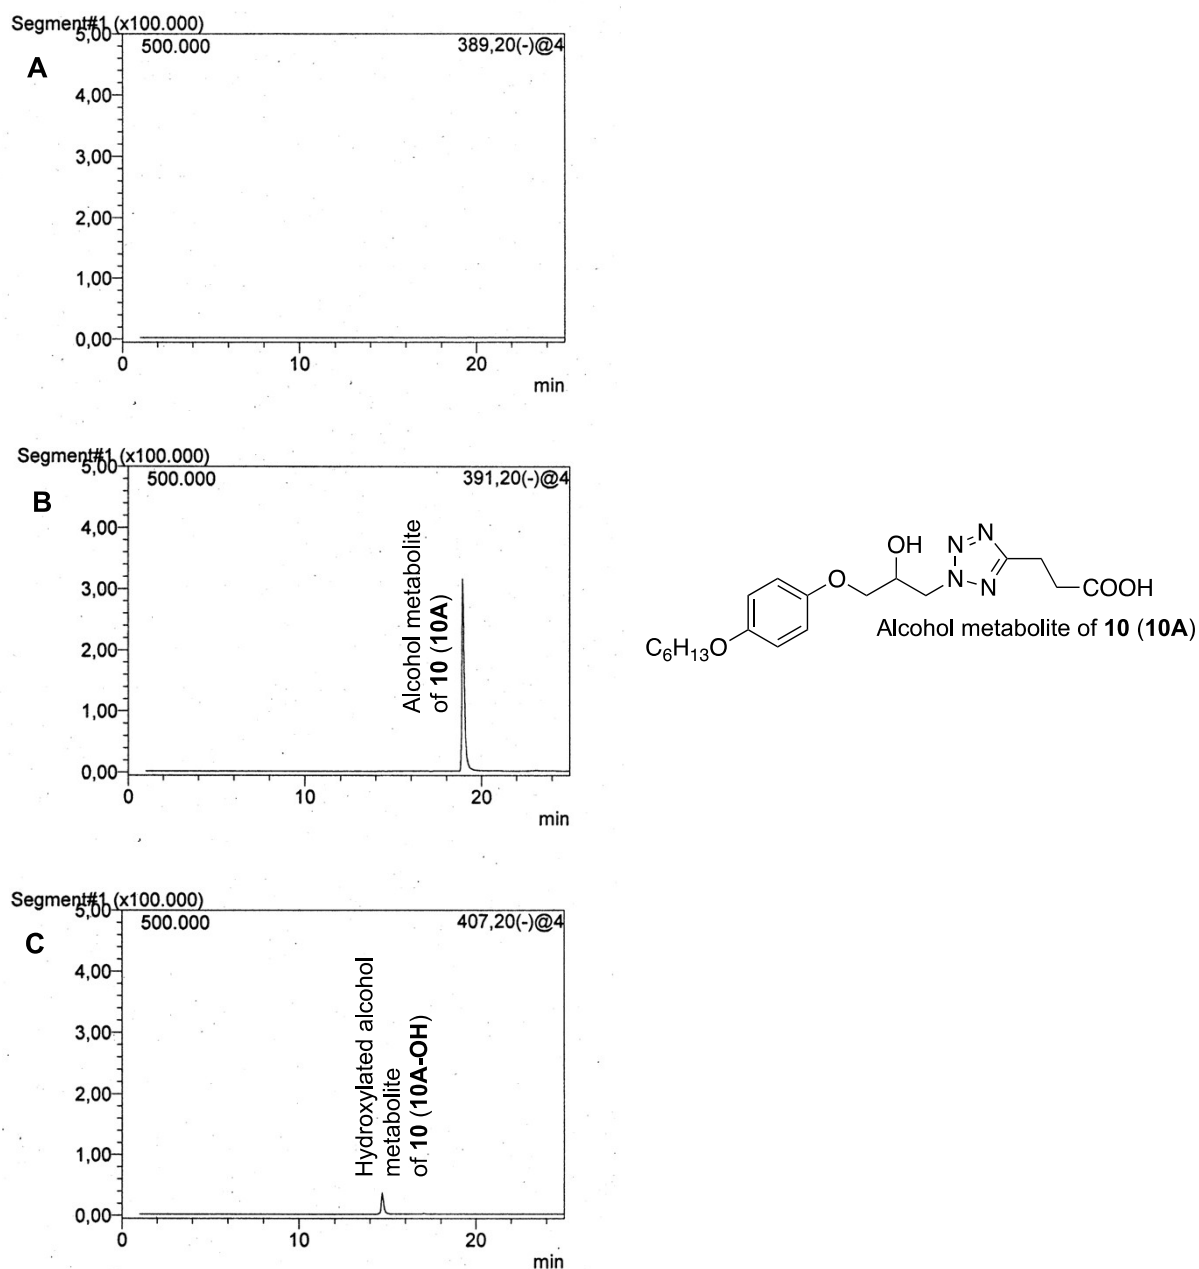

**Figure 2** HPLC-MS ESI negative-chromatograms (SIM mode) obtained after incubation of **10** with rat liver S9 fraction in presence of NADPH; (A)  $m/z$  trace of the parent compound **10**; (B)  $m/z$  trace of the metabolite of **10** formed by reduction of the ketone group to an alcohol (**10A**); (C)  $m/z$  trace of a cytochrome P450 oxidation product of the alcohol metabolite of **10** (**10A-OH**).

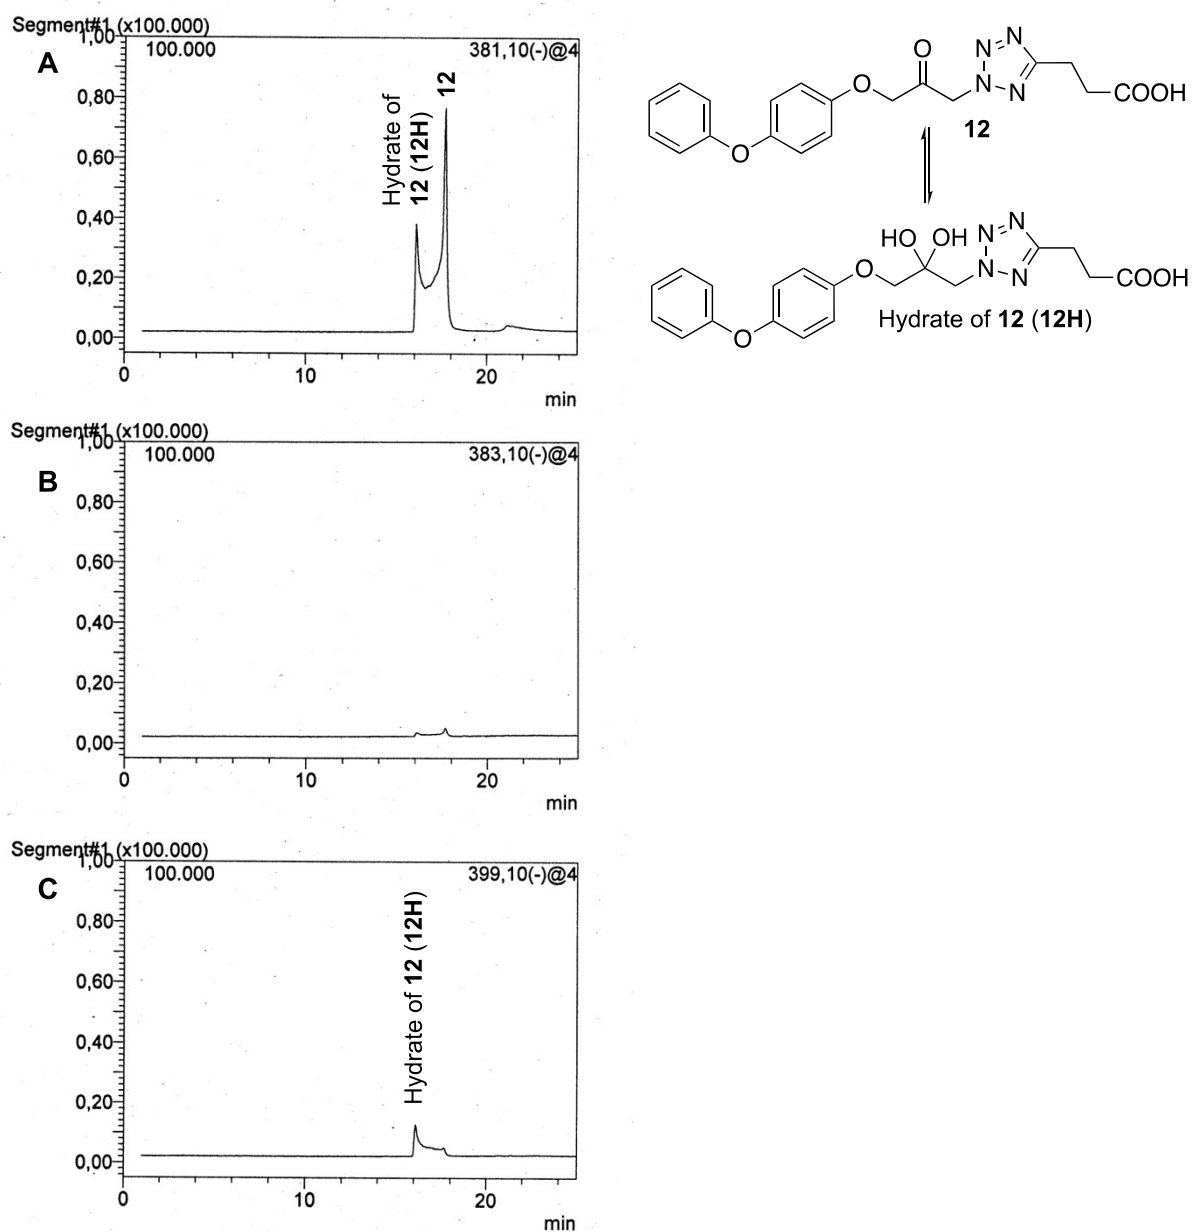

**Figure 3** HPLC-MS ESI negative-chromatograms (SIM mode) obtained when enzymatic activity of the S9 fraction was inactivated by acetonitrile before addition of the test compound **12**; (A)  $m/z$  trace of the parent compound **12**; (B)  $m/z$  trace of the metabolite of **12** formed by reduction of the ketone group to an alcohol and of the (M+2) isotope of **12**; (C)  $m/z$  trace of the hydrate form of **12** (**12H**).

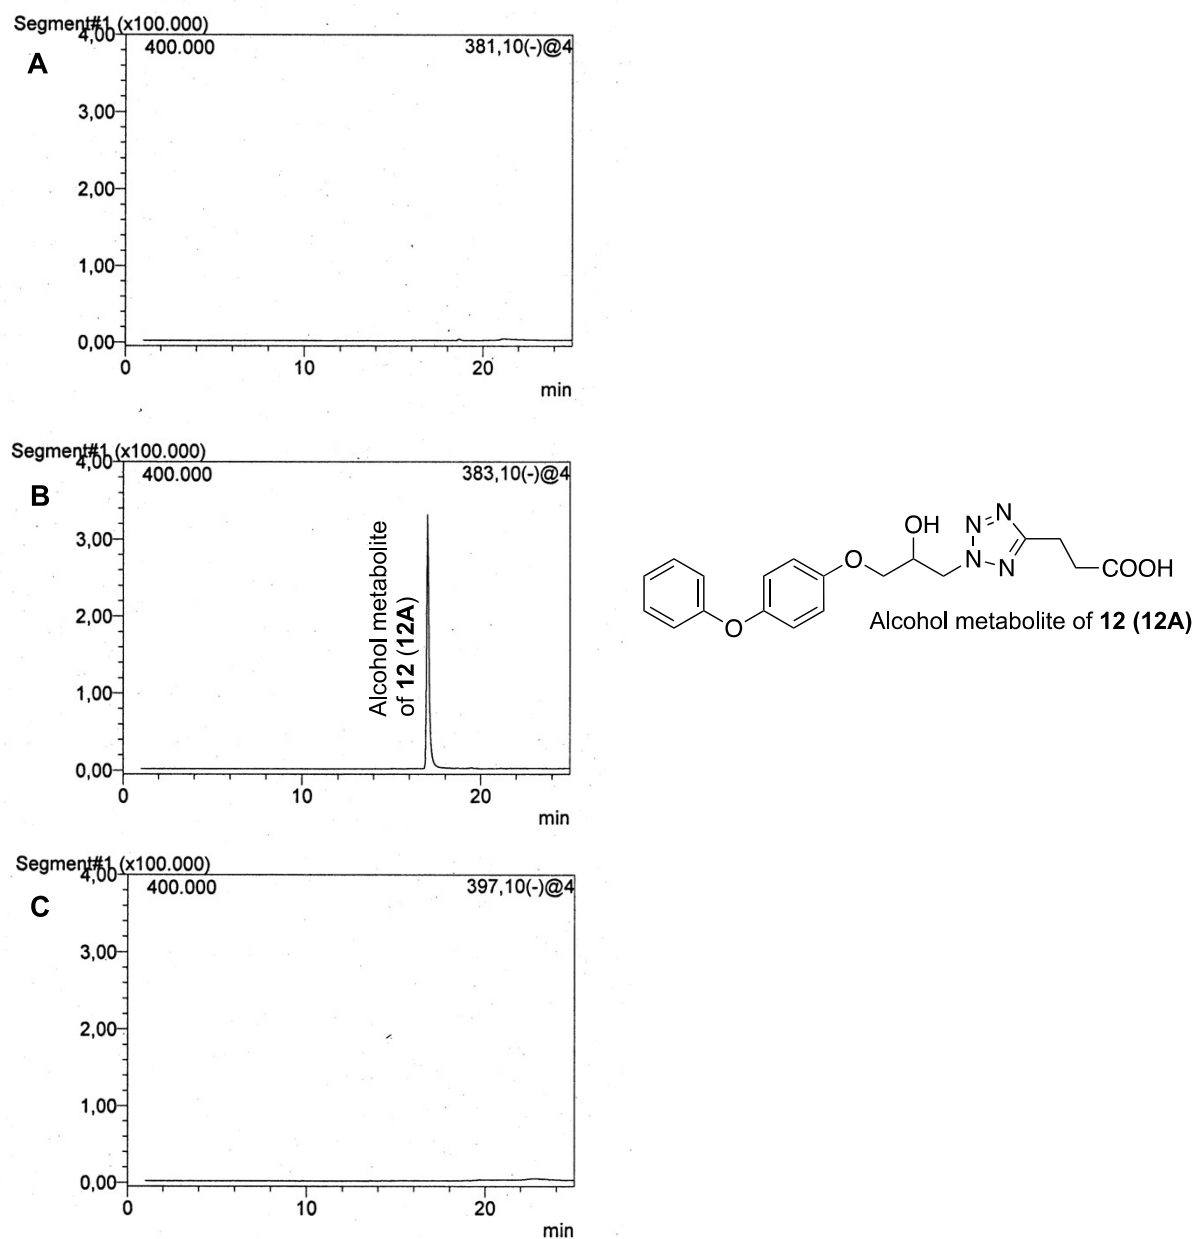

**Figure 4** HPLC-MS ESI negative-chromatograms (SIM mode) obtained after incubation of **12** with rat liver S9 fraction in presence of NADPH; (A)  $m/z$  trace of the parent compound **12**; (B)  $m/z$  trace of the metabolite of **12** formed by reduction of the ketone group to an alcohol (**12A**); (C)  $m/z$  trace of a cytochrome P450 oxidation product of the alcohol metabolite of **12**.

Results: In the samples in which the microsomal enzymes were inactivated prior to addition of the test substance, only the parent compounds were detected (Figures 1 and 3). These appeared as double peaks, which is due to the fact that the activated ketones are in equilibrium with their hydrate forms. In the ESI source, the latter readily lose water, so that both forms are detected at the same mass-to-charge ratio.

In the samples in which the test compounds were incubated with the S9 fraction in the presence of NADPH, no parent compound could be detected after 30 min (Figures 2 and 4). Accordingly, large peaks of their alcohol metabolites formed by reduction of the ketone functions by carbonyl reductases appear. In the case of **10**, small amounts of a metabolite were detected ( $m/z$  407.2) (Figure 2) that was probably formed by CYP P450-mediated oxidation of the alcohol metabolite of **10**.

## 2. Spectra of the new target compounds 32 and 44

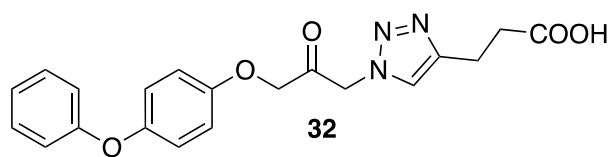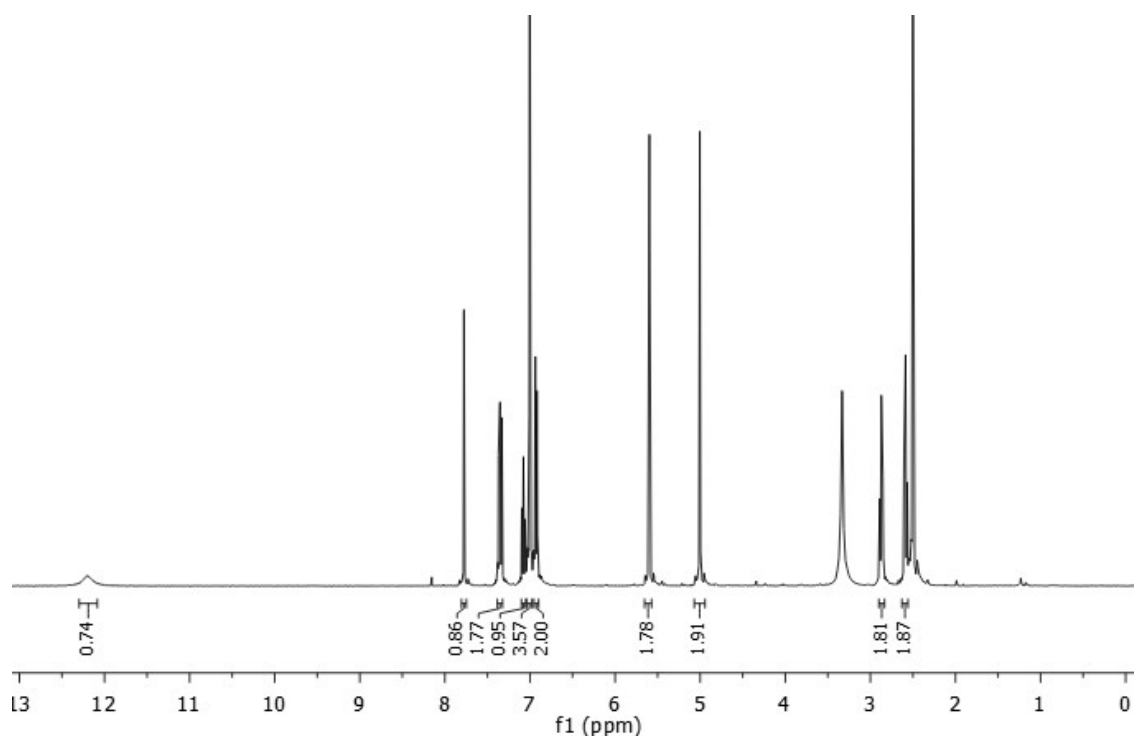

eko072012, ME91, Ekodo  
STANDARD 1H OBSERVE

exp2 s2pu1

```
SAMPLE SPECIAL 23.0
date Jul 29 2012 temp
solvent dmsd gain not used
file /export/home/ spin 20
vnmr1/data/autorun- hst 0.000
data/g270712r01/95- pv90 14.400
05.fid alfa 20.000

ACQUISITION FLAGS
sv 25188.9 il n
at 1.139 in n
np 60422 dp y
fb 13000 hs nn
bs 64 PROCESSING
dl 1.000 lb 1.00
nt 9000 fe not used
ct 9000 DISPLAY

TRANSMITTER sp -1332.3
tn C13 wp 24999.8
sfreq 100.675 rf1 1521.4
tof 1538.2 rfp 0
tpwr 63 rp -78.7
pw 7.200 lp -348.5

DECOUPLER H1 vc 265
do 0 sc 0
da yyy vs 437
dms w th 9
dpwr 35 al no ph
dnt 10200
```

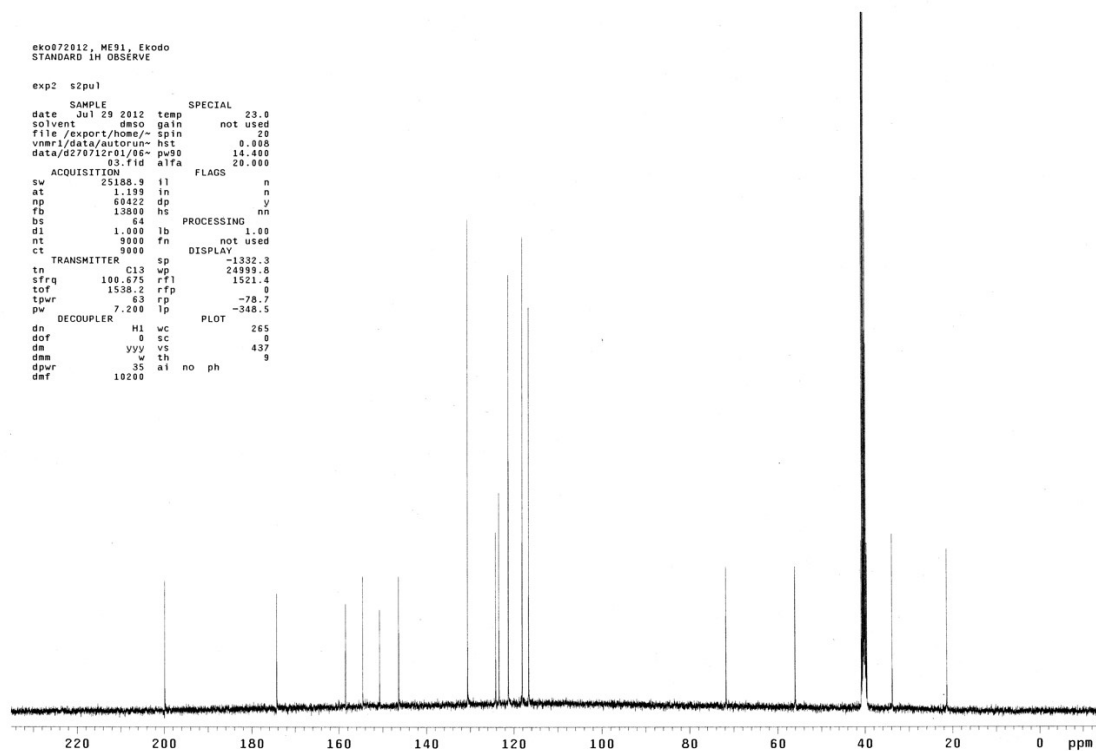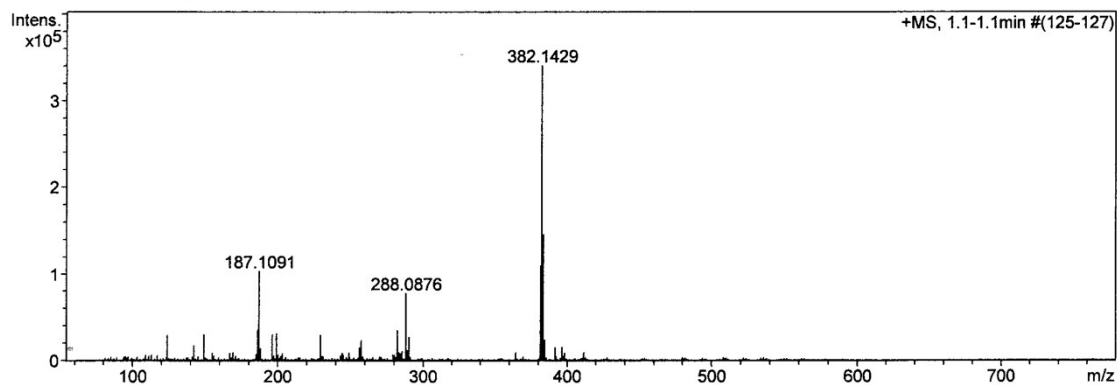

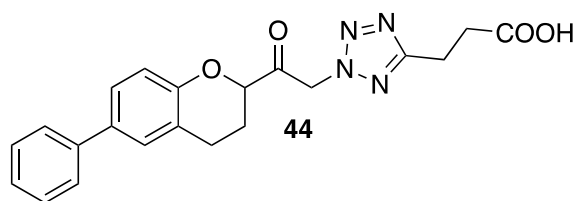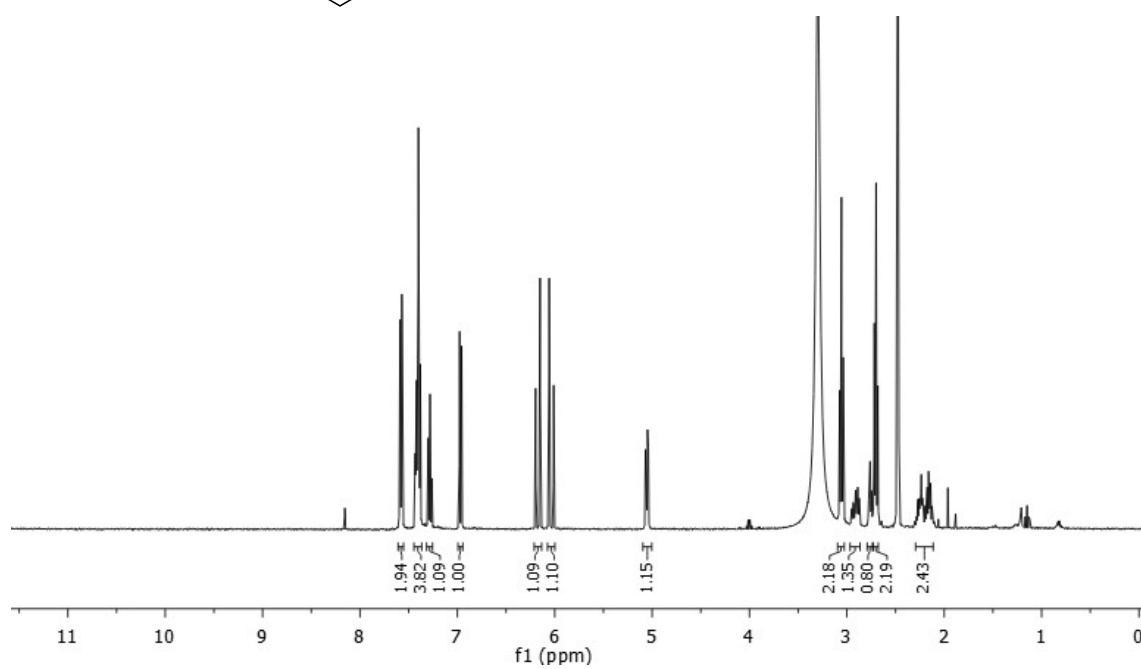

Sample Name:  
eko\_230  
Data Collected on:  
Agilent400-vnmrs400  
Archive directory:  
/home/vnmr1/vnmrsys/data/20140911  
Sample directory:  
eko\_230\_20140911\_01  
FidFile: eko\_230\_CARBON\_01

Pulse Sequence: CARBON (s2pul)  
Solvent: dmsc  
Data collected on: Sep 11 2014

Temp. 25.0 C / 299.1 K  
Sample #4, Operator: vnmr1

Relax. delay 1.000 sec  
Pulse 45.0 degrees  
Acq. time 1.311 sec  
Width 25000.0 Hz  
5000 repetitions  
OBSERVE C13, 100.5512715 MHz  
DECOUPLE H1, 399.8874300 MHz  
Power 38 dB  
continuously on  
WALTZ-16 modulated  
DATA PROCESSING  
Line broadening 0.5 Hz  
FT size 65536  
Total time 3 hr, 12 min

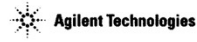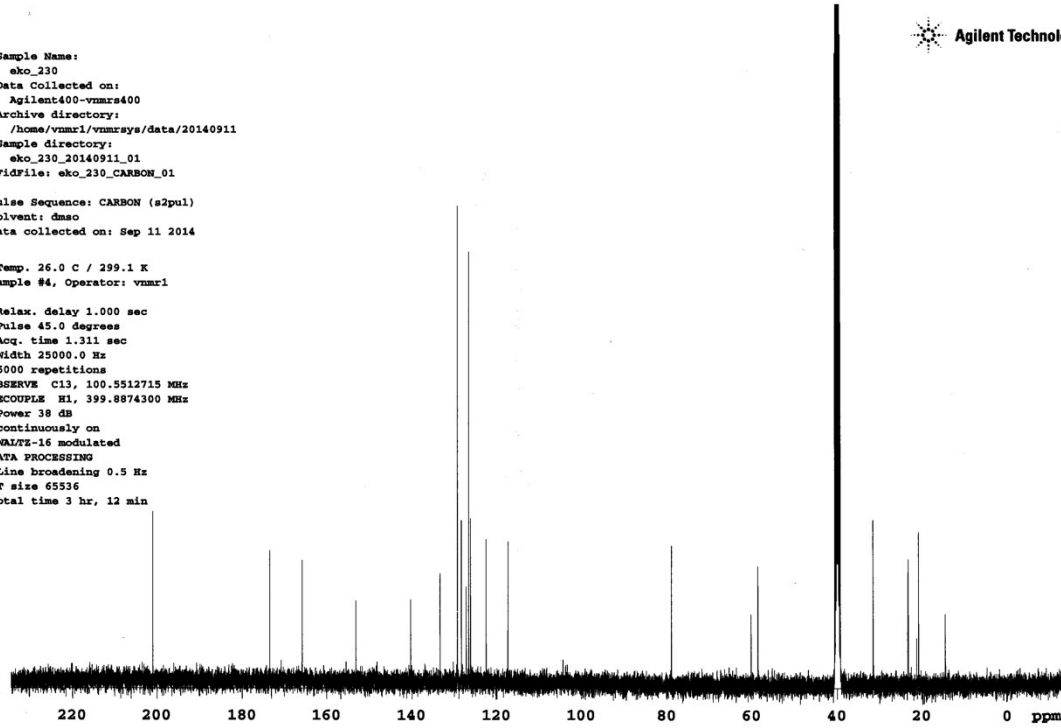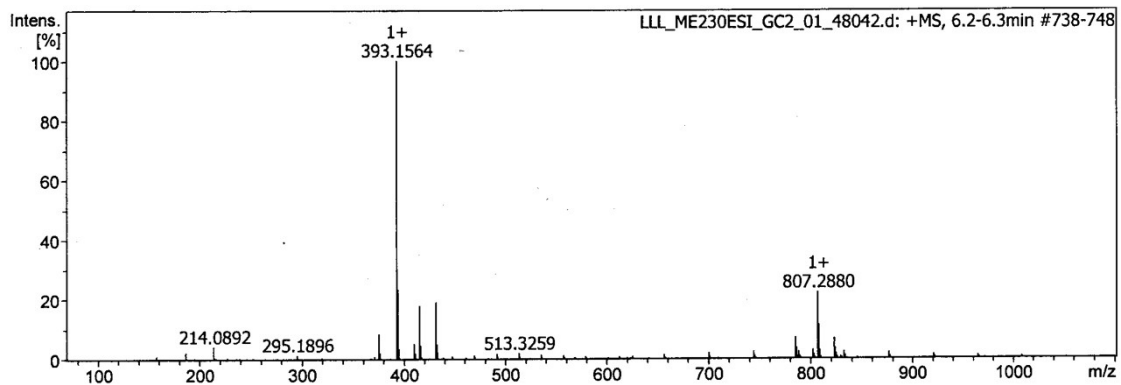

**3.  $^1\text{H}$  and  $^{13}\text{C}$  NMR spectra of the target compounds whose synthesis was already described in the patent applications DE102013016573 and WO2017093351**

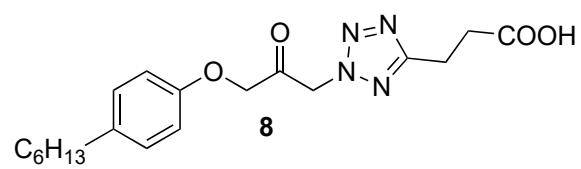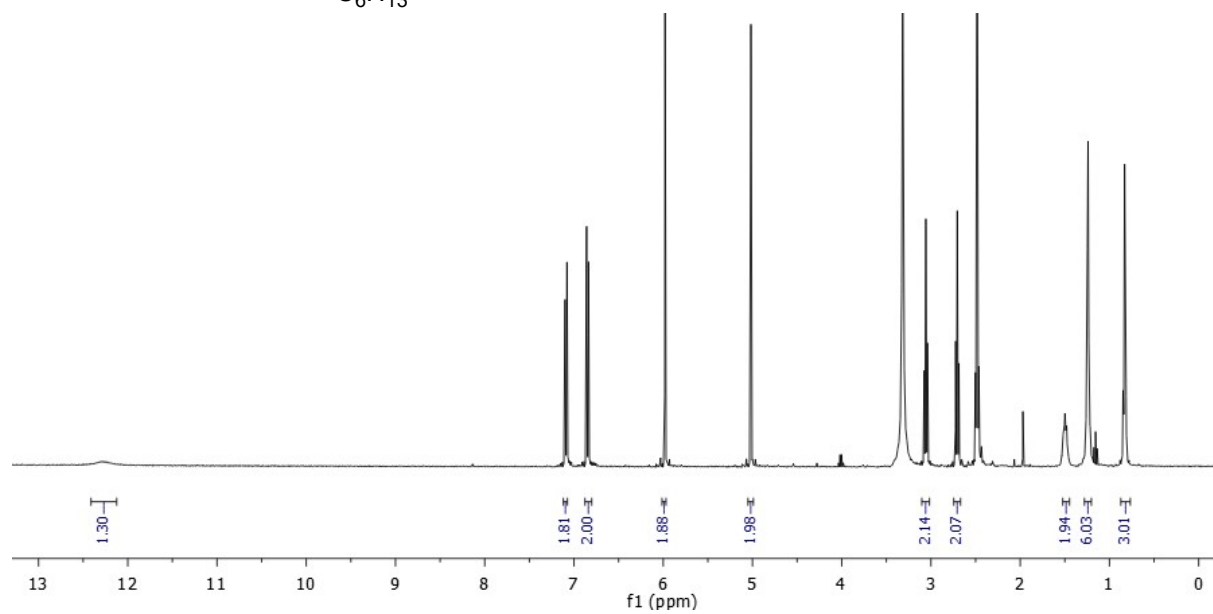

eko8ME102, Ekodo  
STANDARD 1H OBSERVE

Automation directory: /export/home/vnmr1/data/autorundata/d060812r02  
File : 0304

Pulse Sequence: s2pul

Solvent: dmsd  
Temp. 23.0 C / 296.1 K  
Sample #3  
File: 0303  
Mercury-400BB "m400"

Relax. delay 1.000 sec  
Pulse 45.0 degrees  
Acq. time 1.199 sec  
Width 25188.9 Hz  
6888 repetitions  
OBSERVE C13, 100.637820 MHz  
DECOUPLE H1, 400.3350112 MHz  
Power 35 dB  
continuously on  
VOLT2-16 modulated  
DATA PROCESSING  
Line broadening 1.0 Hz  
FT size 65536  
Total time 3 hr, 48 min, 59 sec

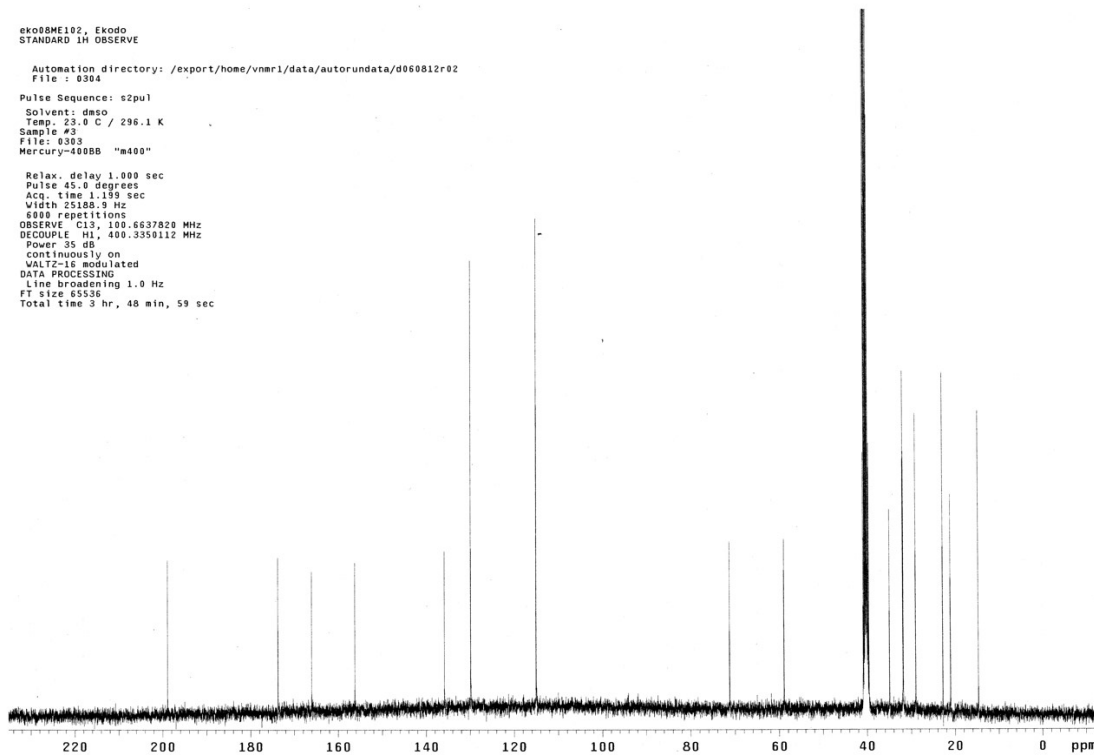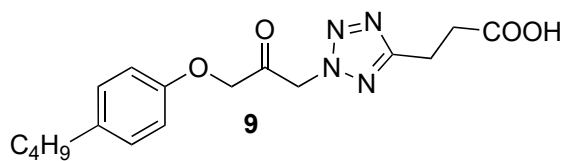

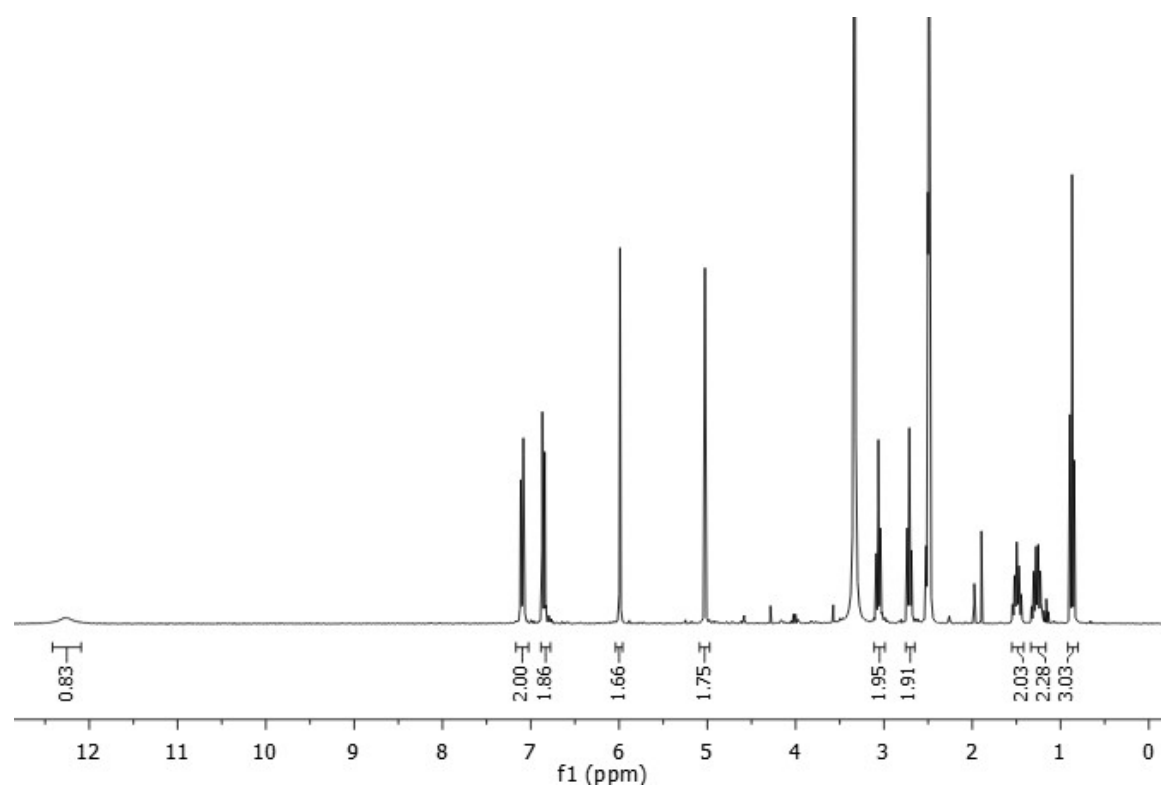

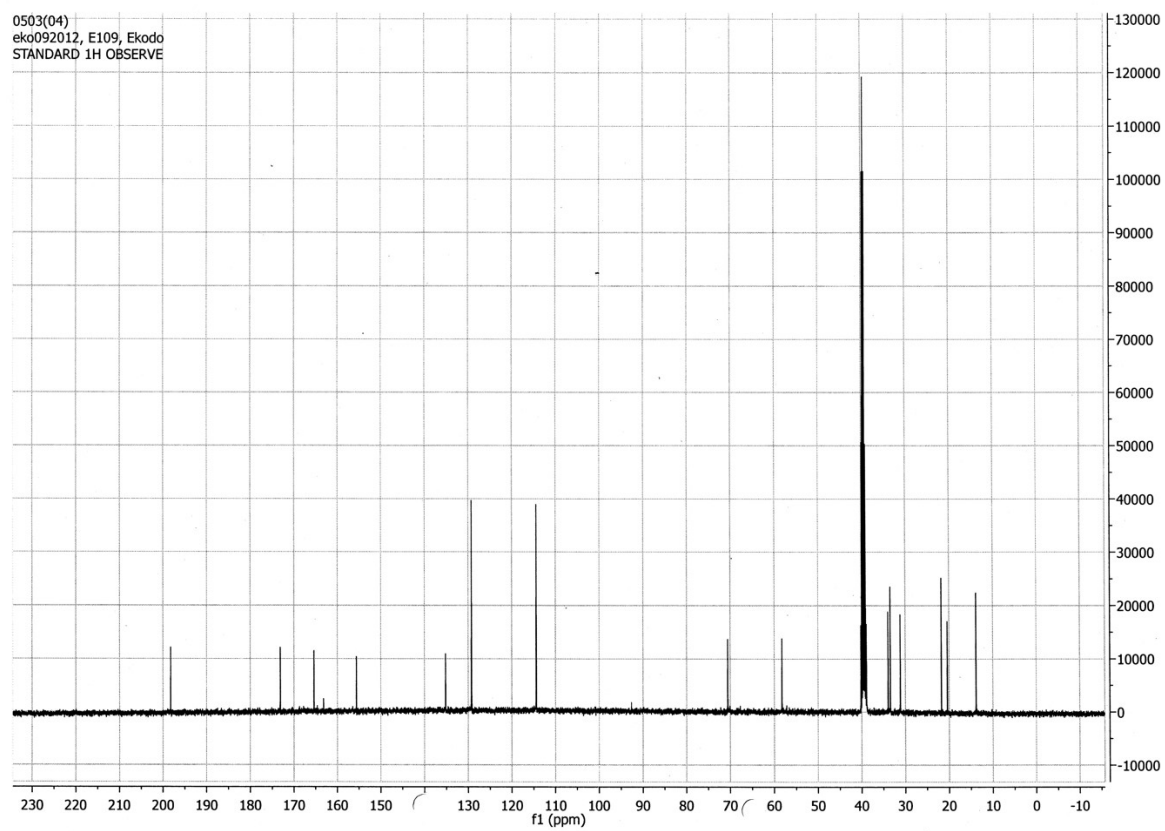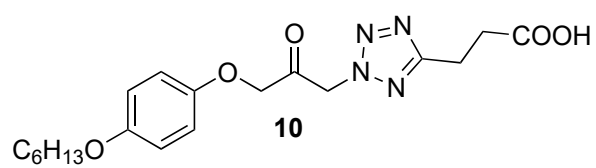

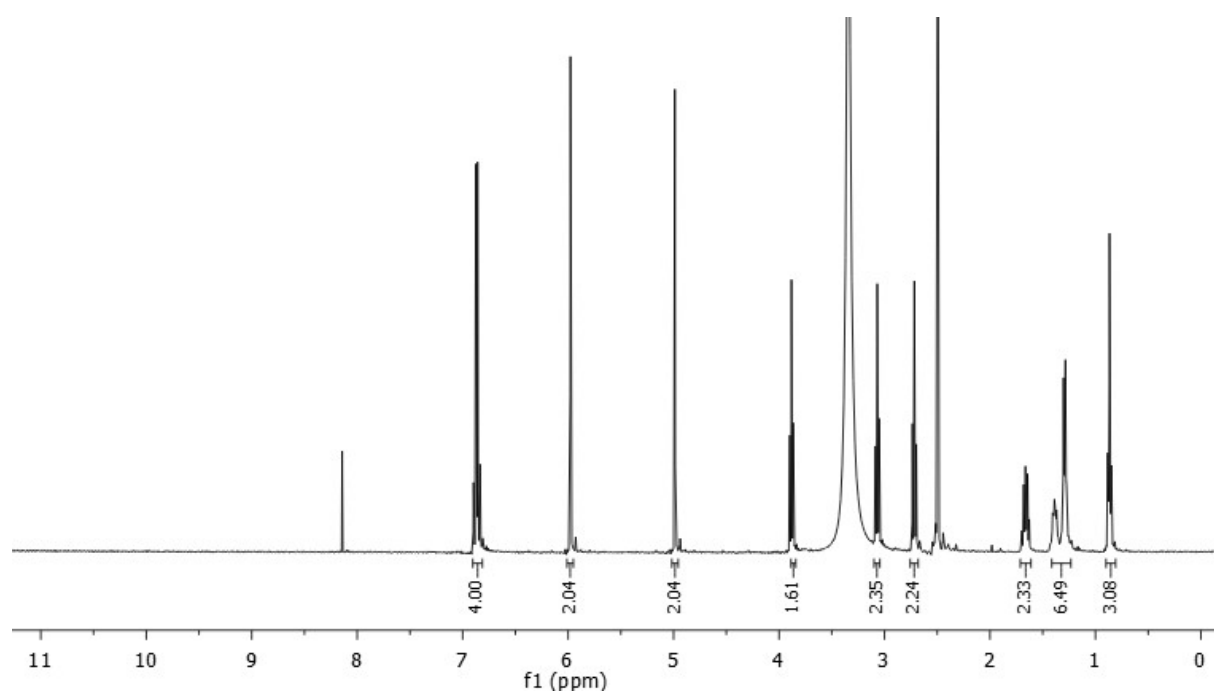

Sample Name:  
eko\_ME122  
Data Collected on:  
Agilent-MMR-vnmr600  
Archive directory:  
/home/vnmr1/vnmr5/data/20130916  
Sample directory:  
eko\_ME122\_20130916\_01  
FidFile: eko\_ME122\_CARBON\_01

Pulse Sequence: CARBON (a2pul)  
Solvent: dmsc  
Data collected on: Sep 16 2013

Temp. 26.0 C / 299.1 K  
Sample #32, Operator: vnmr1

Relax. delay 1.000 sec  
Pulse 45.0 degrees  
Acq. time 0.865 sec  
Width 37878.8 Hz  
5000 repetitions  
OBSERVE C13, 150.8239603 MHz  
DECOUPLE H1, 599.8194251 MHz  
Power 42 dB  
continuously on  
WALTZ-16 modulated  
DATA PROCESSING  
Line broadening 0.5 Hz  
FT size 65536  
Total time 2 hr, 35 min

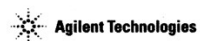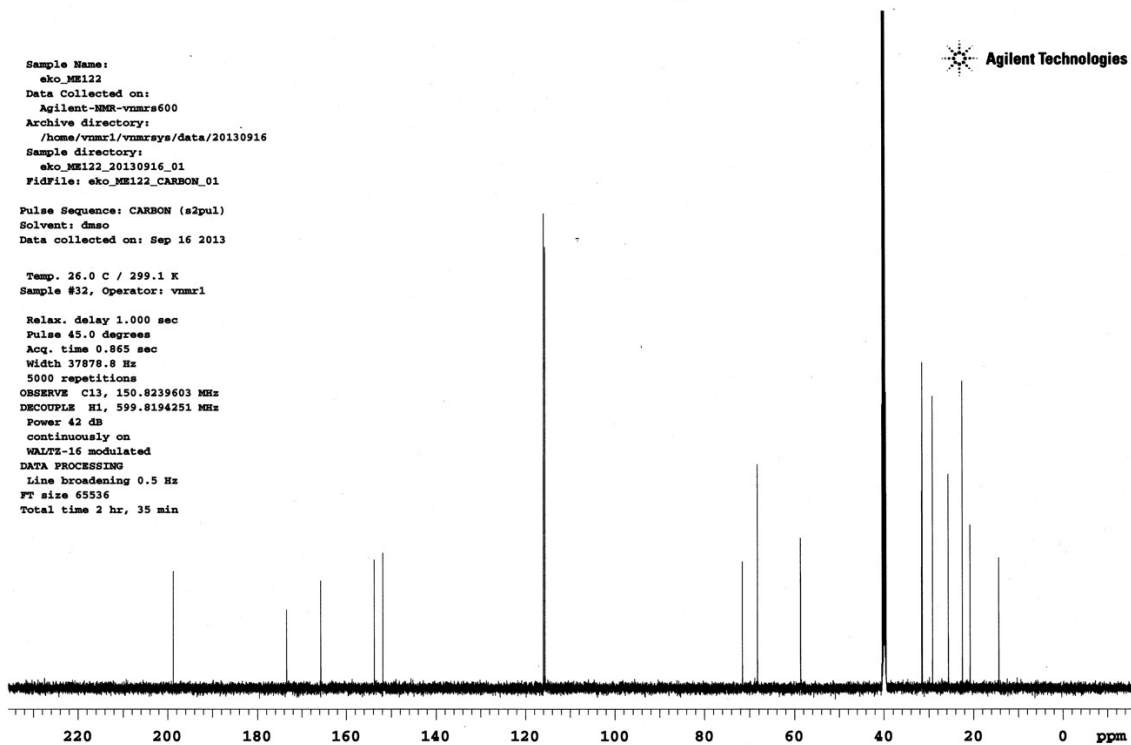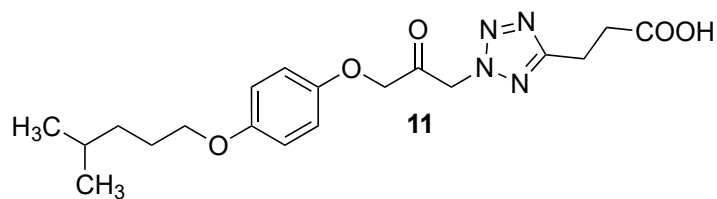

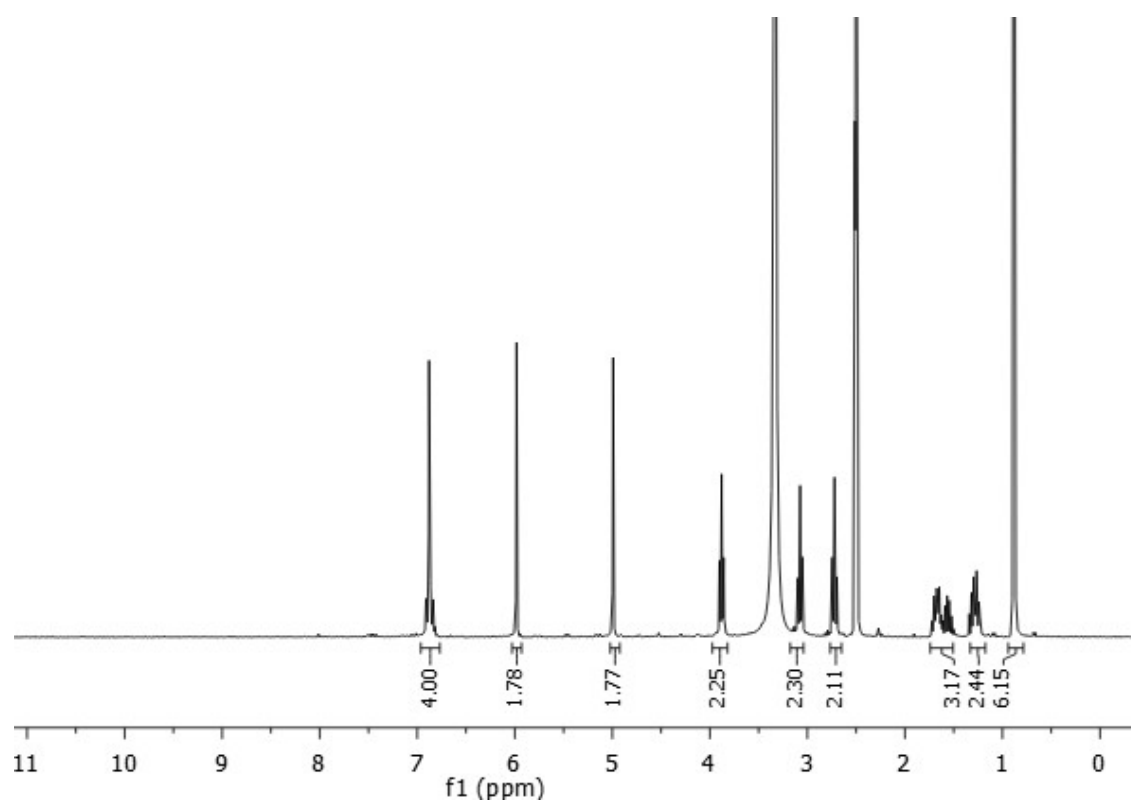

eko092012, F115, Ekodo  
STANDARD 1H OBSERVE

Automation directory: /export/home/vnmr1/data/autorundata/d070912r01  
File : 0704

Pulse Sequence: s2pul

Solvent: dms0  
Temp. 23.0 C / 296.1 K  
Sample #7  
File: 0703  
Mercury-400BB "m400"

Relax. delay 1.000 sec  
Pulse 45.0 degrees  
Acq. time 1.199 sec  
Width 25186.9 Hz  
5000 repetitions  
OBSERVE C13, 100.6637820 MHz  
DECOUPLE H1, 400.3350112 MHz  
Power 35 dB  
Continuously on  
WALTZ-16 modulated  
DATA PROCESSING  
Line broadening 1.0 Hz  
FT size 65536  
Total time 3 hr, 10 min, 52 sec

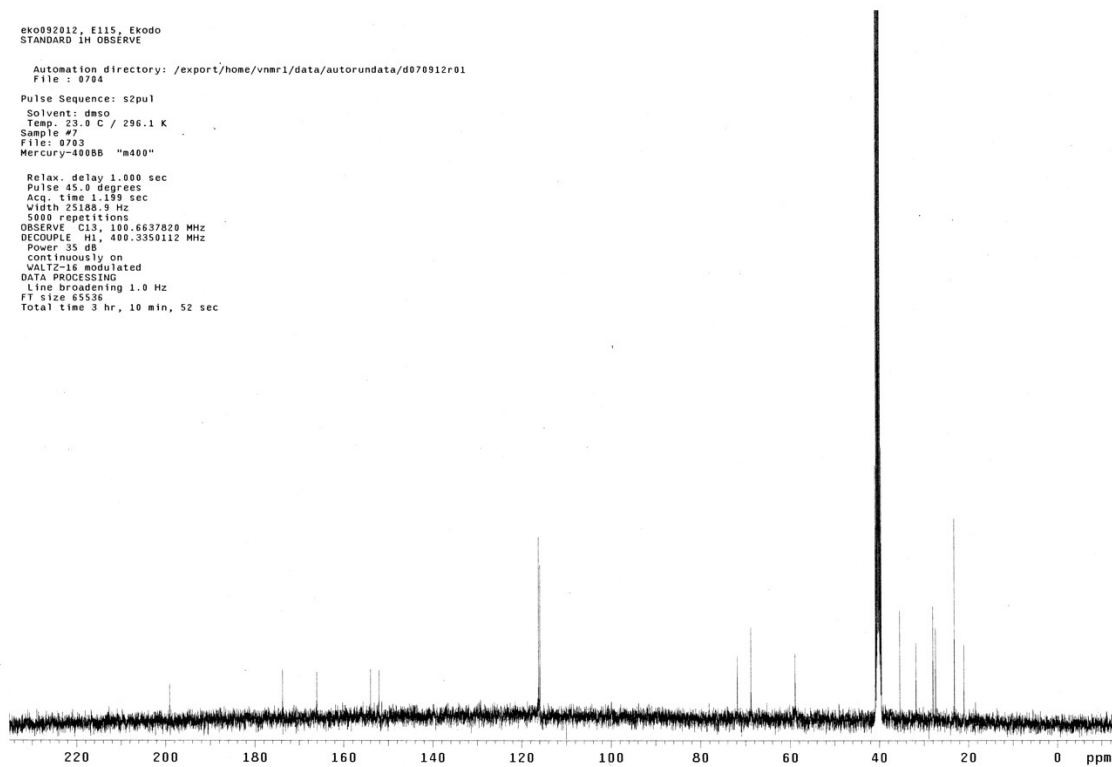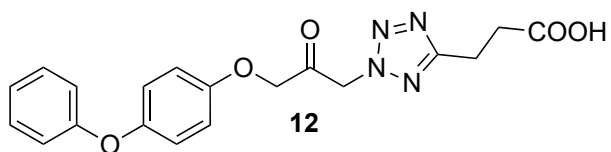

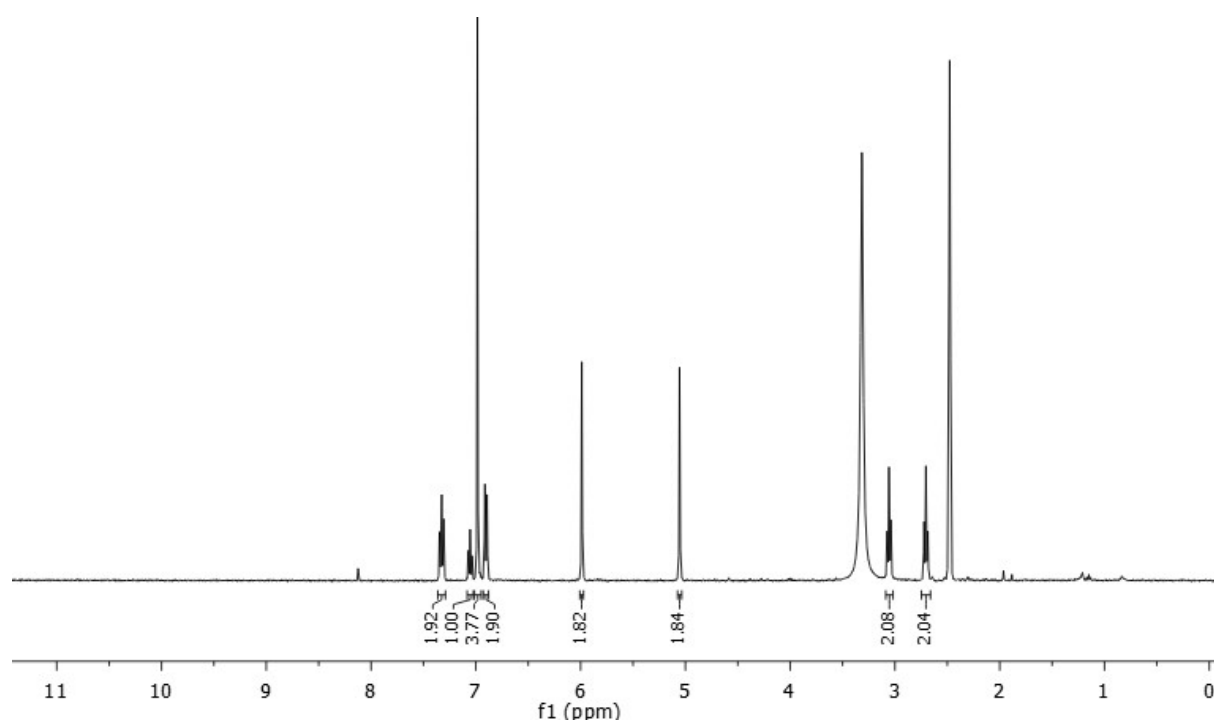

Sample Name:  
eko\_661  
Data Collected on:  
Agilent-MSR-vnmr600  
Archive directory:  
/home/vnmr1/vnmrsws/data/20140724  
Sample directory:  
eko\_661\_20140724\_01  
Fidfile: eko\_661\_CARBON\_01

Pulse Sequence: CARBON (s2pul)  
Solvent: dmsc  
Data collected on: Jul 24 2014

Temp. 26.0 C / 299.1 K  
Sample #1, Operator: vnmr1

Relax. delay 1.000 sec  
Pulse 45.0 degrees  
Acq. time 0.865 sec  
Width 37878.8 Hz  
5000 repetitions  
OBSERVE C13, 150.8170790 MHz  
DECOUPLE H1, 599.7920585 MHz  
Power 33 dB  
continuously on  
WALTZ-16 modulated  
DATA PROCESSING  
Line broadening 0.5 Hz  
FT size 65536  
Total time 2 hr, 35 min

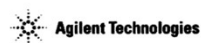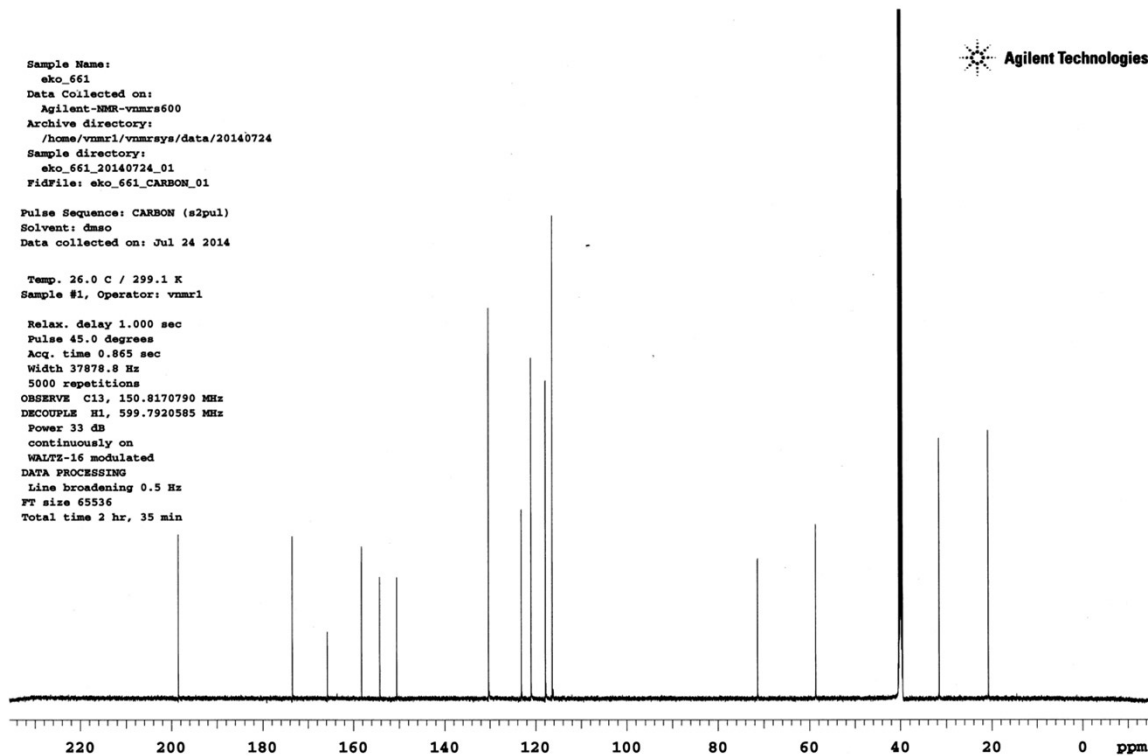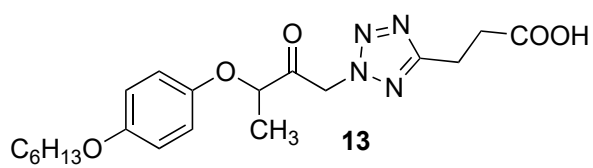

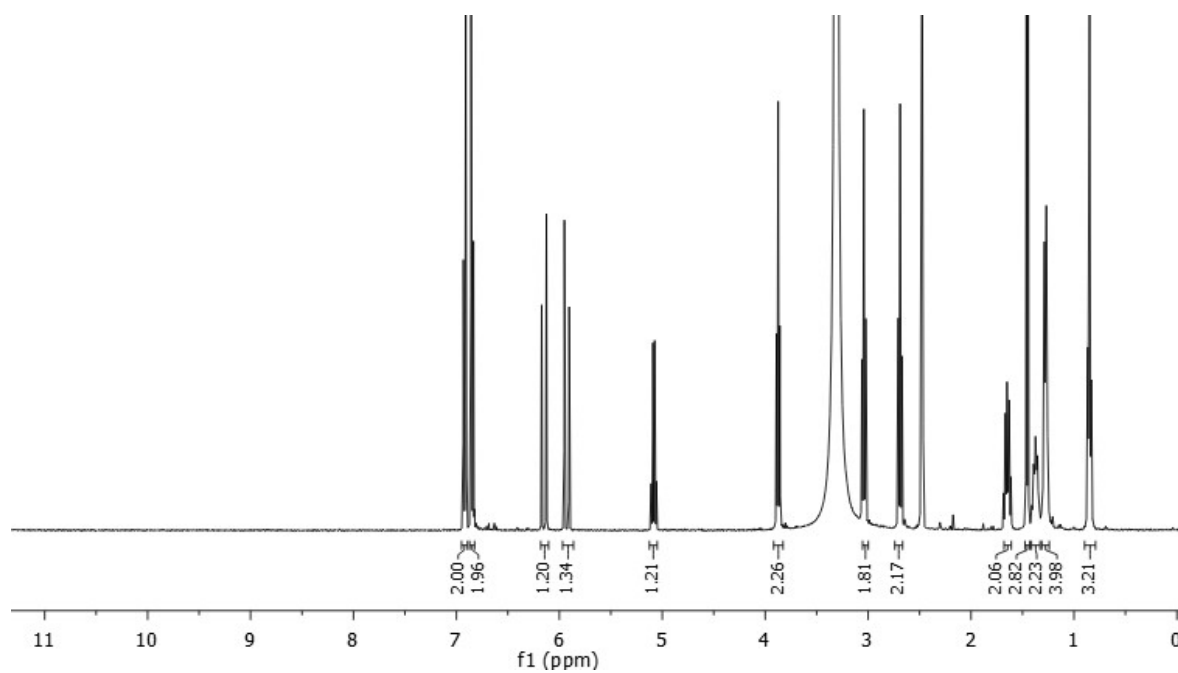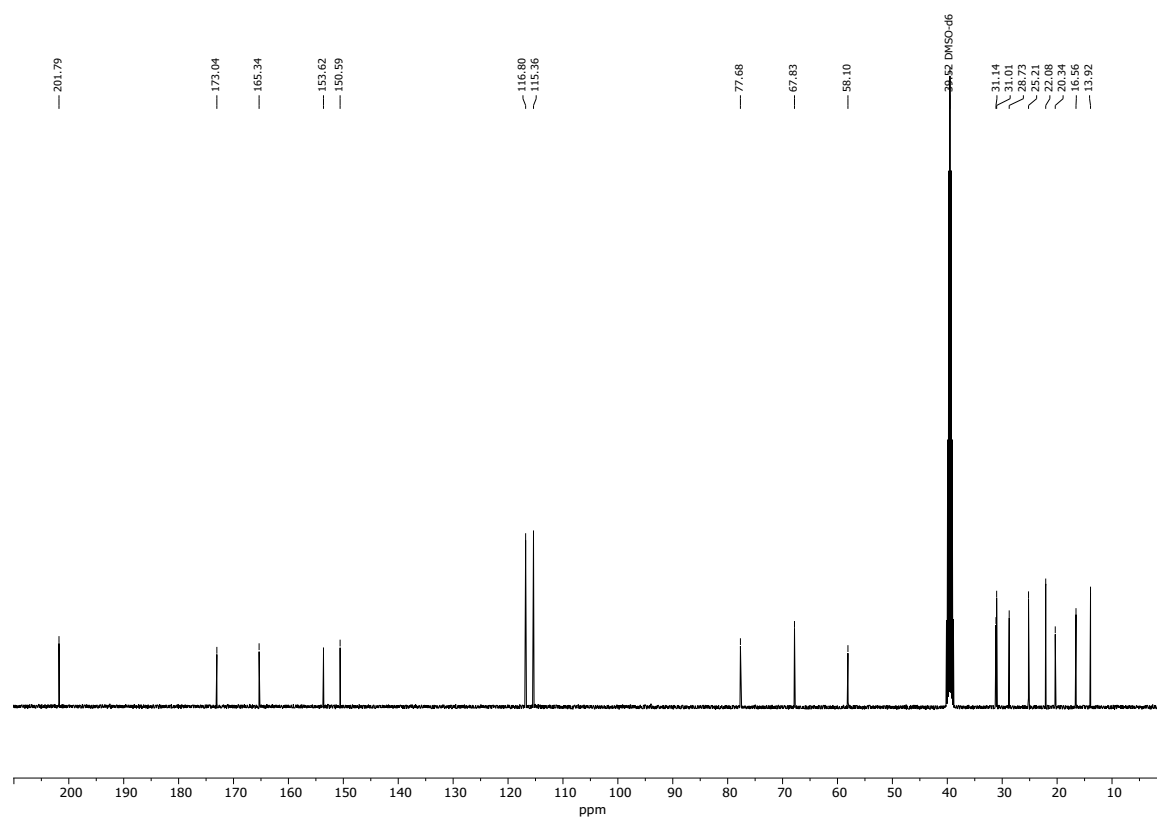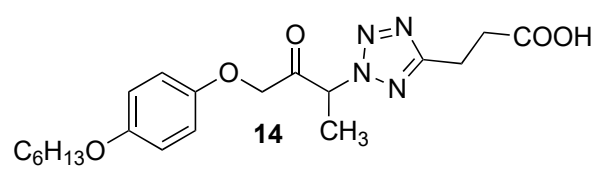

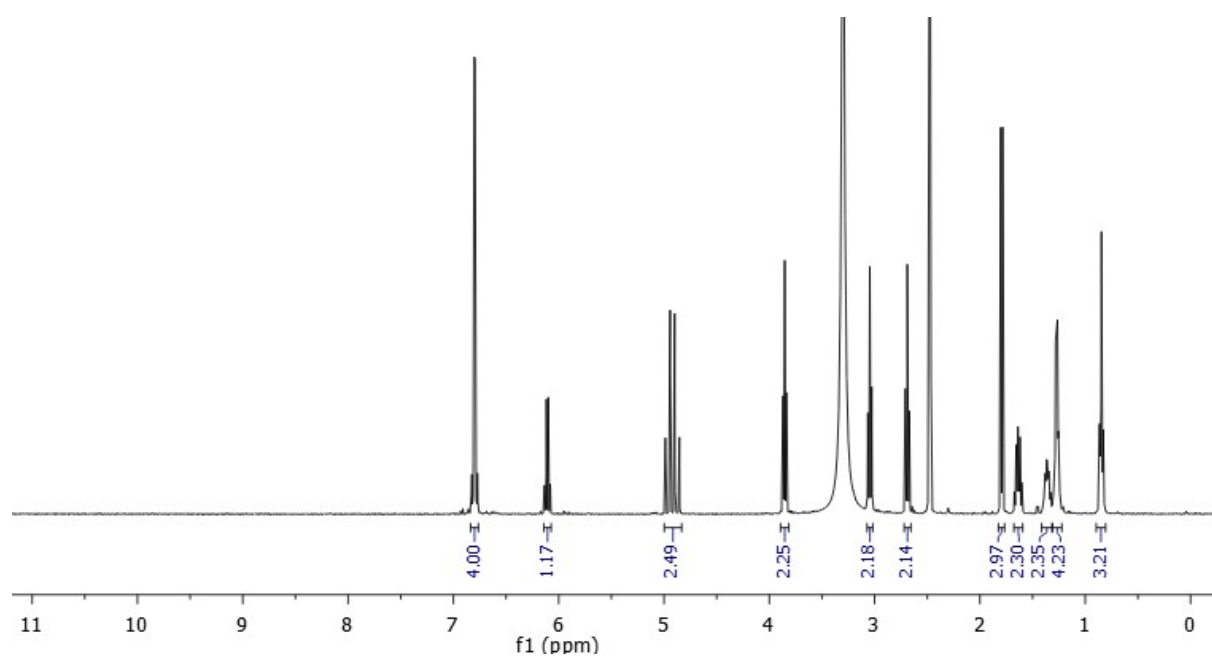

Sample Name:  
eko\_ME197  
Data Collected on:  
Agilent400-vnmrs400  
Archive directory:  
/home/vnmr1/vnmrsys/data/20140814  
Sample directory:  
eko\_ME197\_20140814\_01  
Fidfile: eko\_ME197\_CARBON\_01

Pulse Sequence: CARBON (s2pul)  
Solvent: dmsd  
Data collected on: Aug 14 2014

Temp. 26.0 C / 299.1 K  
Sample #32, Operator: vnmr1

Relax. delay 1.000 sec  
Pulse 45.0 degrees  
Acq. time 1.311 sec  
Width 25000.0 Hz  
5000 repetitions  
OBSERVE C13, 100.5512715 MHz  
DECOUPLE H1, 399.8874300 MHz  
Power 38 dB  
continuously on  
WALTZ-16 modulated  
DATA PROCESSING  
Line broadening 0.5 Hz  
Ft size 65536  
Total time 3 hr, 12 min

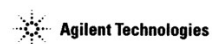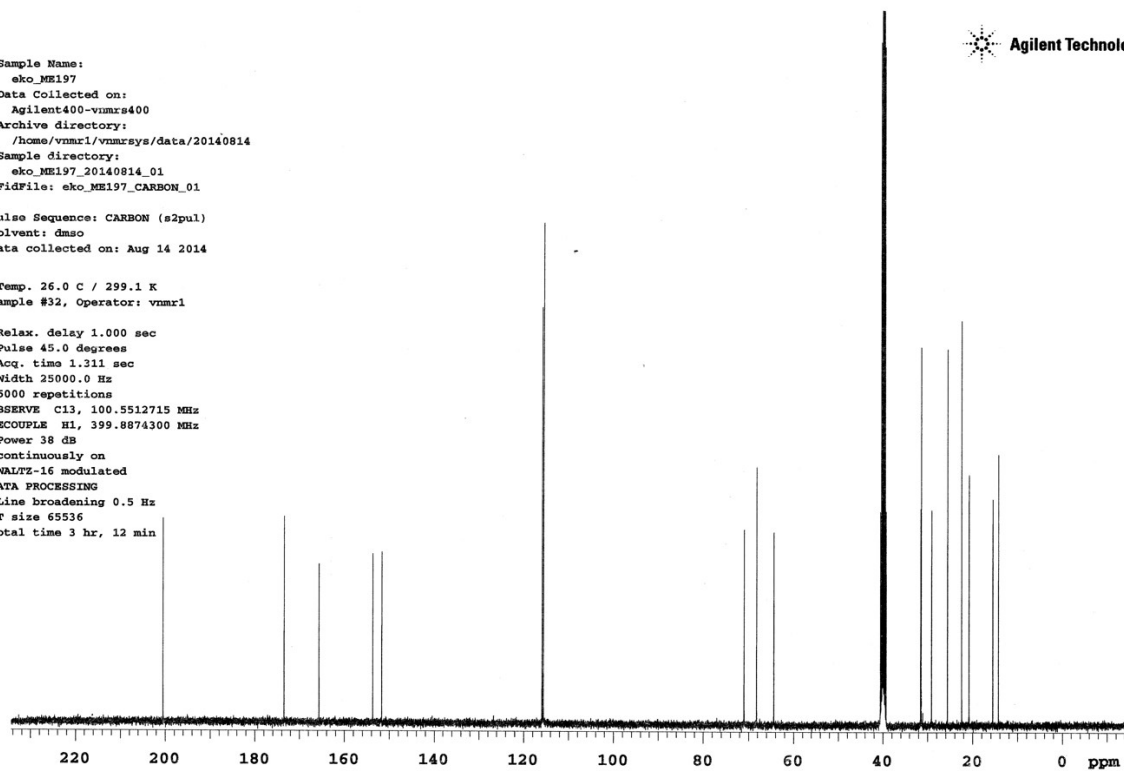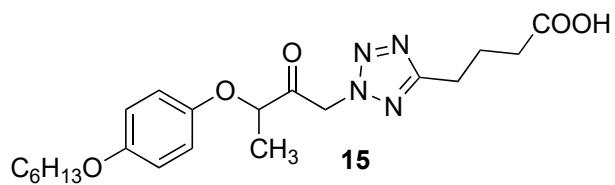

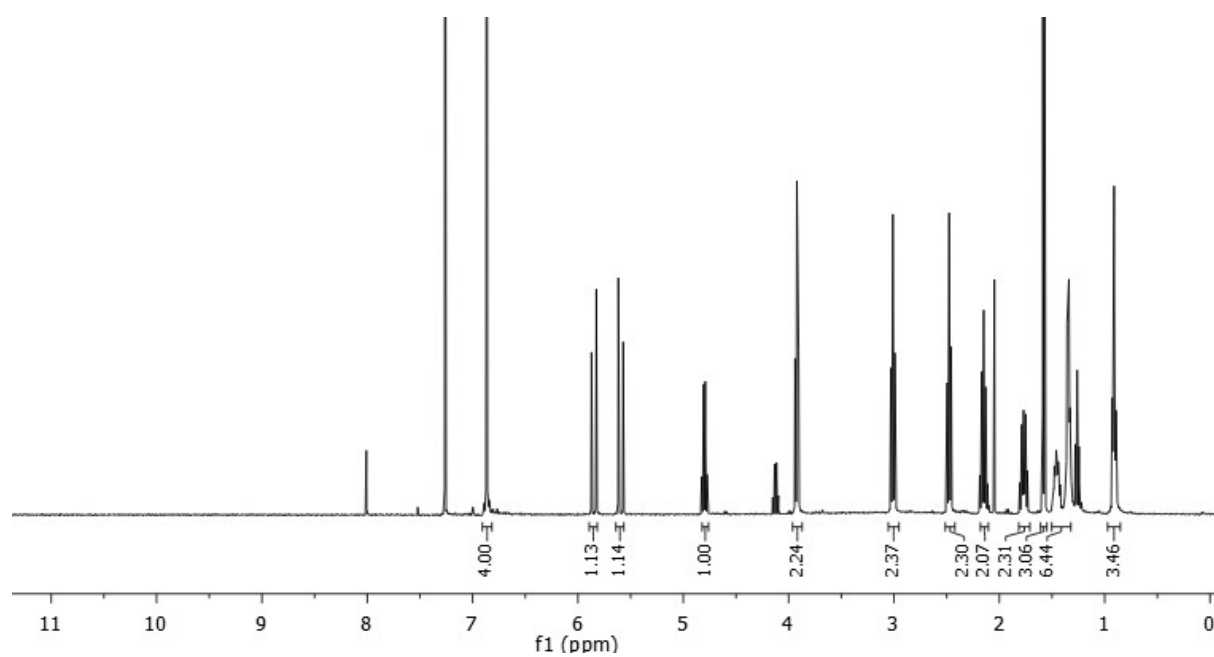

Sample Name:  
eko\_214B  
Data Collected on:  
Agilent-MMR-vnmrs600  
Archive directory:  
/home/vnmr1/vnmrsys/data/20140725  
Sample directory:  
eko\_214B\_20140725\_01  
Fidfile: eko\_214B\_CARBON\_01

Pulse Sequence: CARBON (s2pul)  
Solvent: cdcl3  
Data collected on: Jul 25 2014

Temp. 26.0 C / 299.1 K  
Sample #6, Operator: vnmr1

Relax. delay 1.000 sec  
Pulse 45.0 degrees  
Acq. time 0.865 sec  
Width 37878.8 Hz  
5000 repetitions  
OBSERVE C13, 150.8163611 MHz  
DECOUPLE H1, 599.7892035 MHz  
Power 33 dB  
continuously on  
WALTZ-16 modulated  
DATA PROCESSING  
Line broadening 0.5 Hz  
FT size 65536  
Total time 2 hr, 35 min

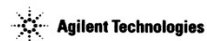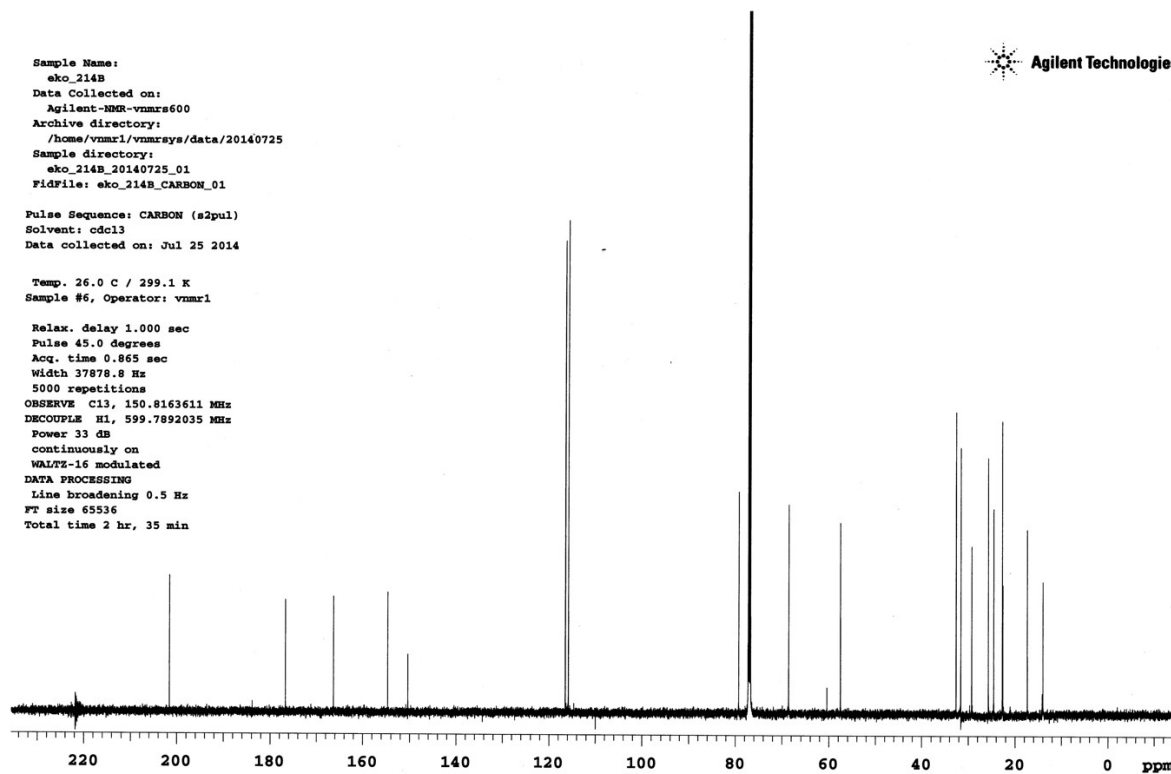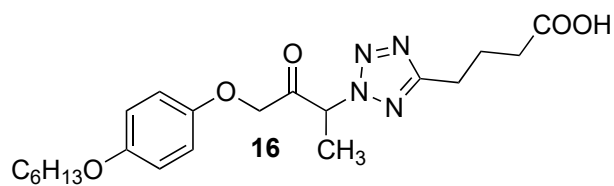

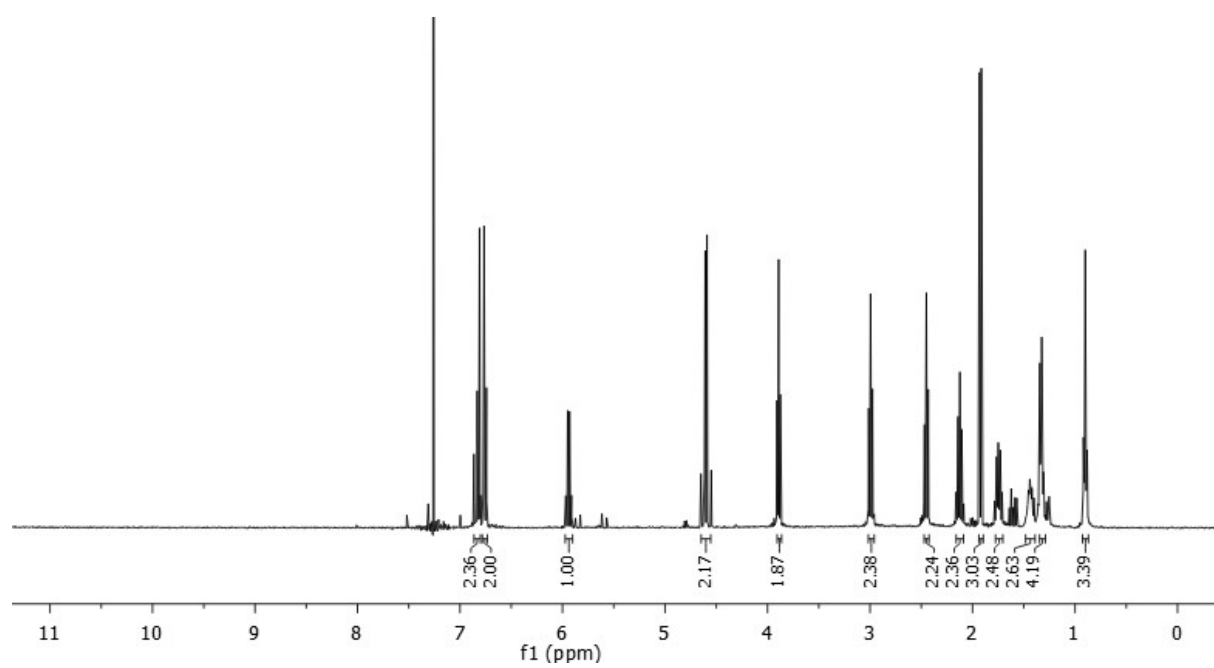

eko072012, ME82, Ekodo  
STANDARD 1H OBSERVE

exp2 s2pu1

| SAMPLE              |                | SPECIAL |            |
|---------------------|----------------|---------|------------|
| date                | Jul 28 2012    | temp    | 23.0       |
| solvent             | dms            | gain    | . not used |
| file                | /export/home/~ | spin    | 20         |
| nmr1/data/autorun-  | hst            |         | 0.000      |
| data/d270712r01/05- | pw90           |         | 14.400     |
| 03.fid              | alfa           |         | 20.000     |

  

| ACQUISITION |         | FLAGS |          |
|-------------|---------|-------|----------|
| sw          | 25188.9 | fl    | n        |
| at          | 1.199   | in    | n        |
| np          | 60422   | dp    | y        |
| fb          | 13800   | hs    | nn       |
| bs          | 64      |       |          |
| d1          | 1.000   | lb    | 1.00     |
| nt          | 9000    | fn    | not used |
| ct          | 9000    |       |          |

  

| TRANSMITTER |         | PROCESSING |         |
|-------------|---------|------------|---------|
| tn          | C13     | wp         | -1332.3 |
| sfrq        | 100.625 | rf1        | 24999.8 |
| tof         | 1538.2  | rfp        | 1521.4  |
| tpwr        | 63      | rp         | 0       |
| pw          | 7.200   | lp         | -84.7   |

  

| DECOUPLER |       | DISPLAY |      |
|-----------|-------|---------|------|
| dn        | H1    | wc      | 265  |
| dof       | 0     | sc      | 0    |
| dm        | yyv   | vs      | 1027 |
| dma       | w     | th      | 20   |
| dpr       | 35    | al      | no   |
| daf       | 10200 | ph      |      |

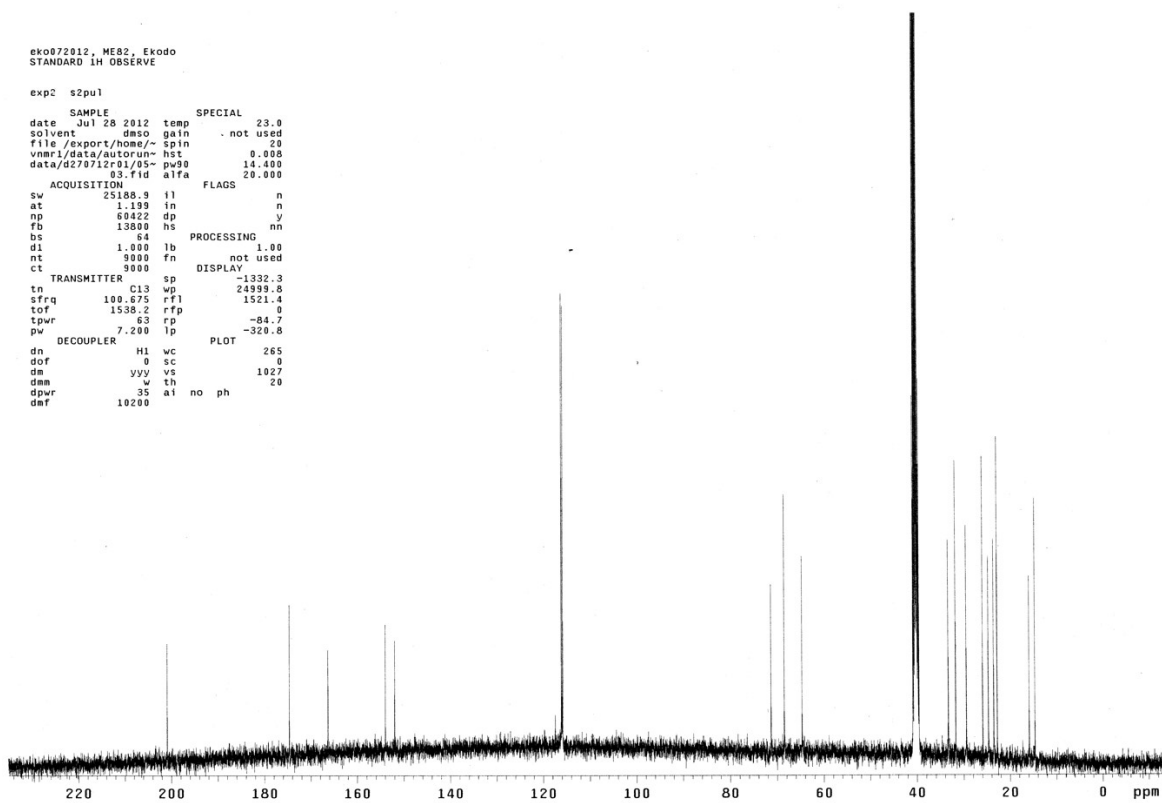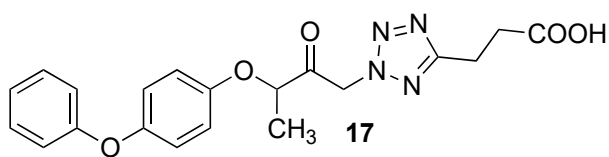

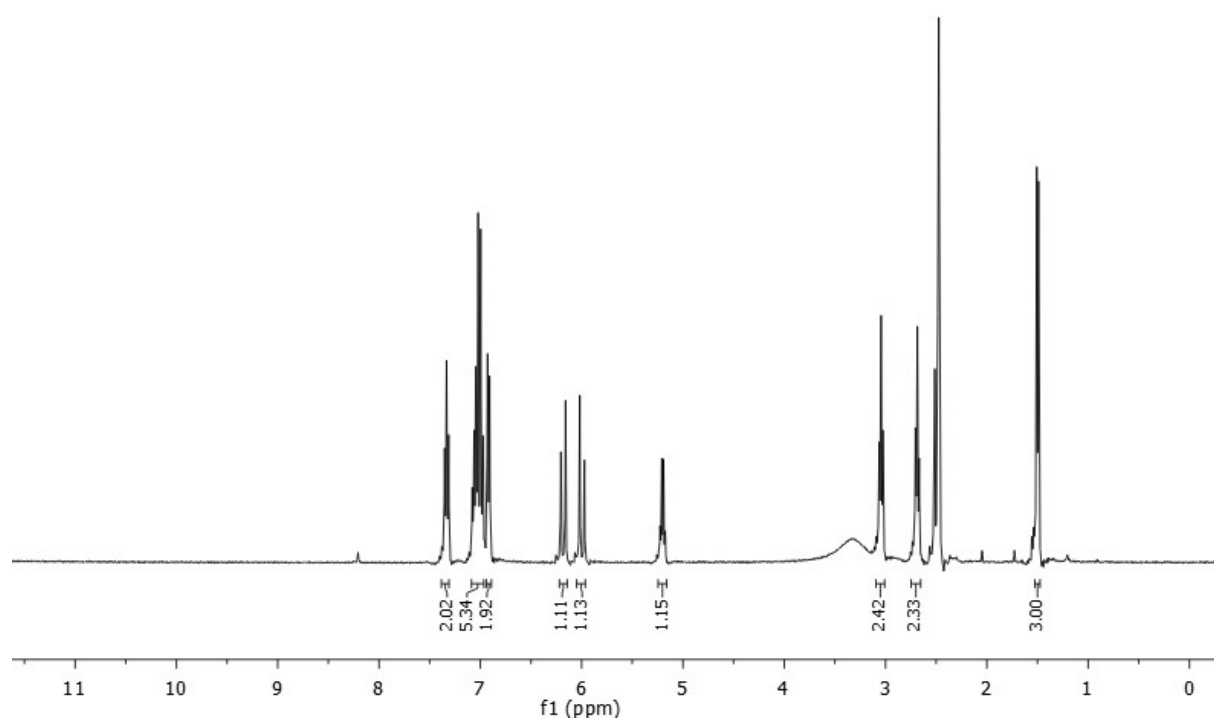

eko042012, ME57, Ekodo  
STANDARD IN OBSERVE

Automation directory: /export/home/vnmr1/data/autorundata/d230412r02  
File: 0604

Pulse Sequence: s2pul

Solvent: dms  
Temp: 23.0 C / 296.1 K  
Sample #6  
File: 0603  
Mercury-400BB "m400"

Relax. delay 1.000 sec  
Pulse 45.0 degrees  
Acq. time 1.159 sec  
Width 25188.9 Hz  
6000 repetitions  
OBSERVE C13, 100.6637820 MHz  
DECOUPLE H1, 400.3350112 MHz  
Power 35 dB  
continuously on  
WALTZ-16 modulated  
DATA PROCESSING  
Line broadening 1.0 Hz  
FT size 65536  
Total time 3 hr, 48 min, 59 sec

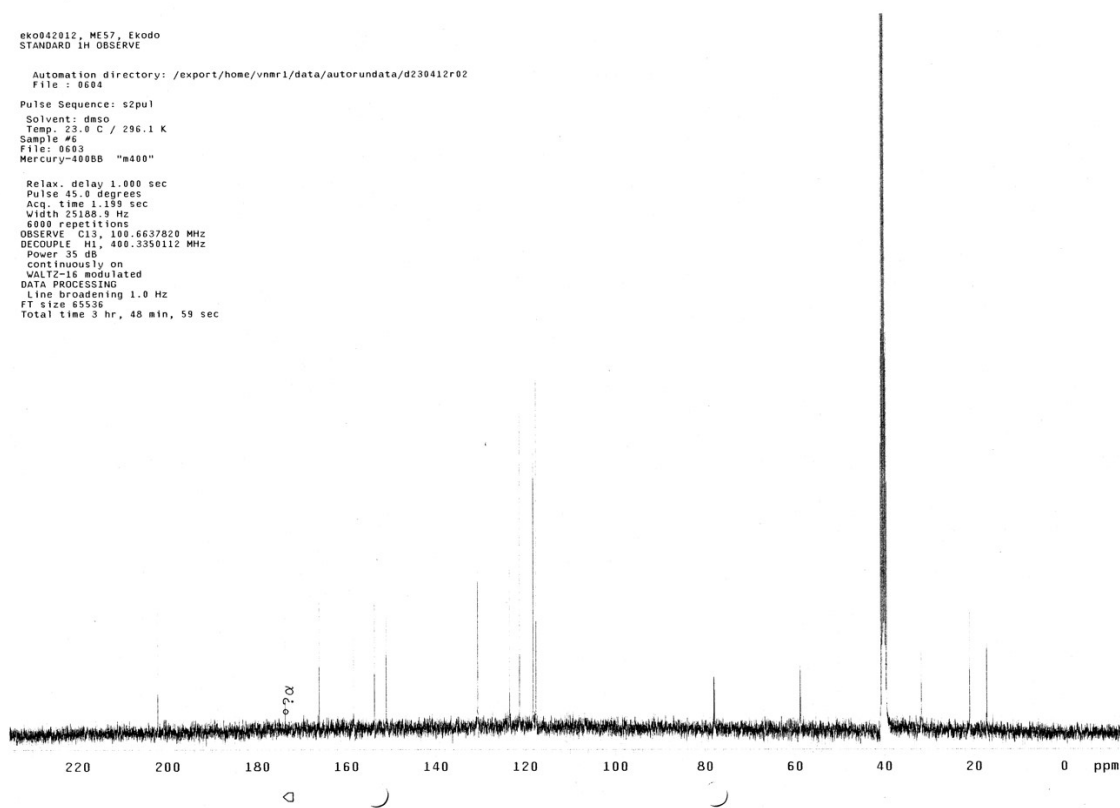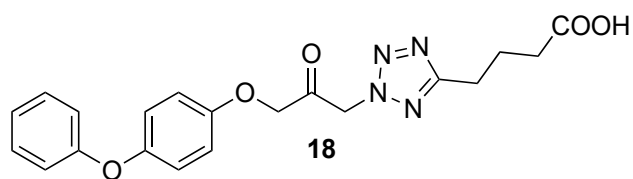

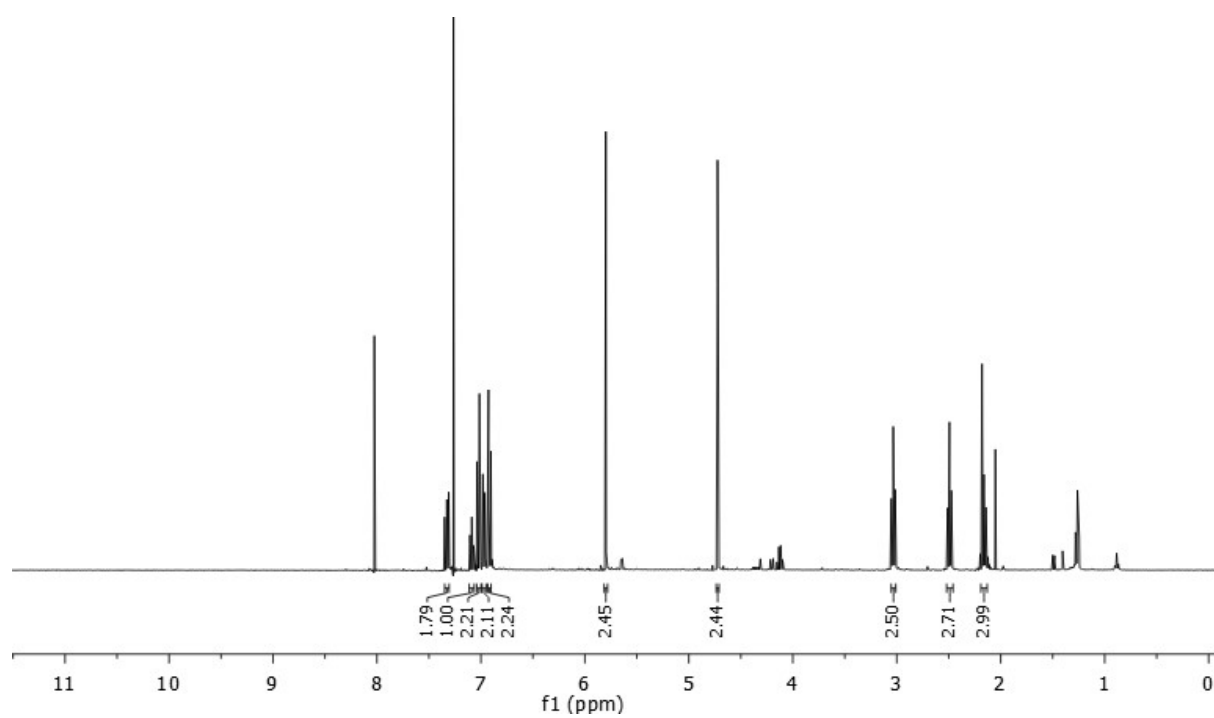

Sample Name:  
eko\_791  
Data Collected on:  
Agilent-NNK-vnmrs600  
Archive directory:  
/home/vnmr1/vnmrsys/data/20140725  
Sample directory:  
eko\_791\_20140725\_01  
FidFile: eko\_791\_CARBON\_01

Pulse Sequence: CARRON (s2pul)  
Solvent: dmsc  
Data collected on: Jul 25 2014

Temp. 26.0 C / 299.1 K  
Sample #3, Operator: vnmr1

Relax. delay 1.000 sec  
Pulse 45.0 degrees  
Acq. time 0.865 sec  
Width 37876.0 Hz  
5000 repetitions  
OBSERVE C13, 150.8170790 MHz  
DECOUPLE H1, 599.7920585 MHz  
Power 33 dB  
continuously on  
WALTZ-16 modulated  
DATA PROCESSING  
Line broadening 0.5 Hz  
FT size 65536  
Total time 2 hr, 35 min

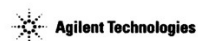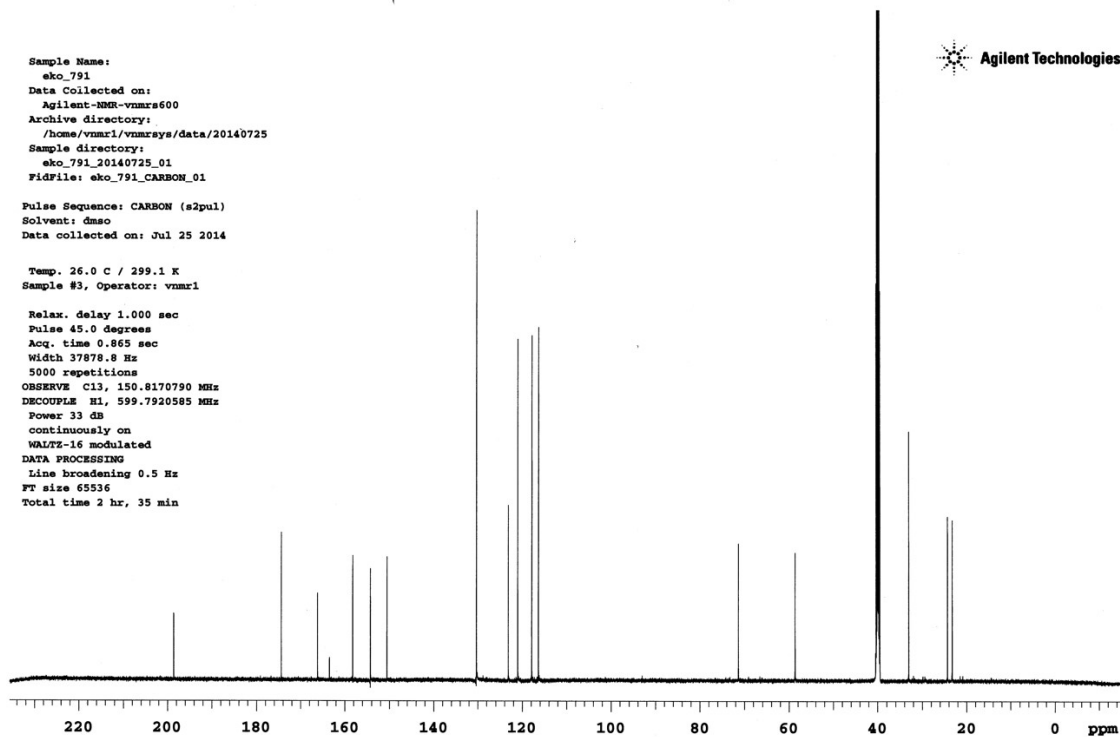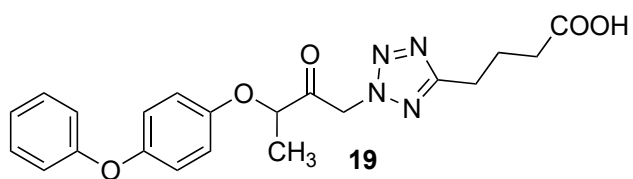

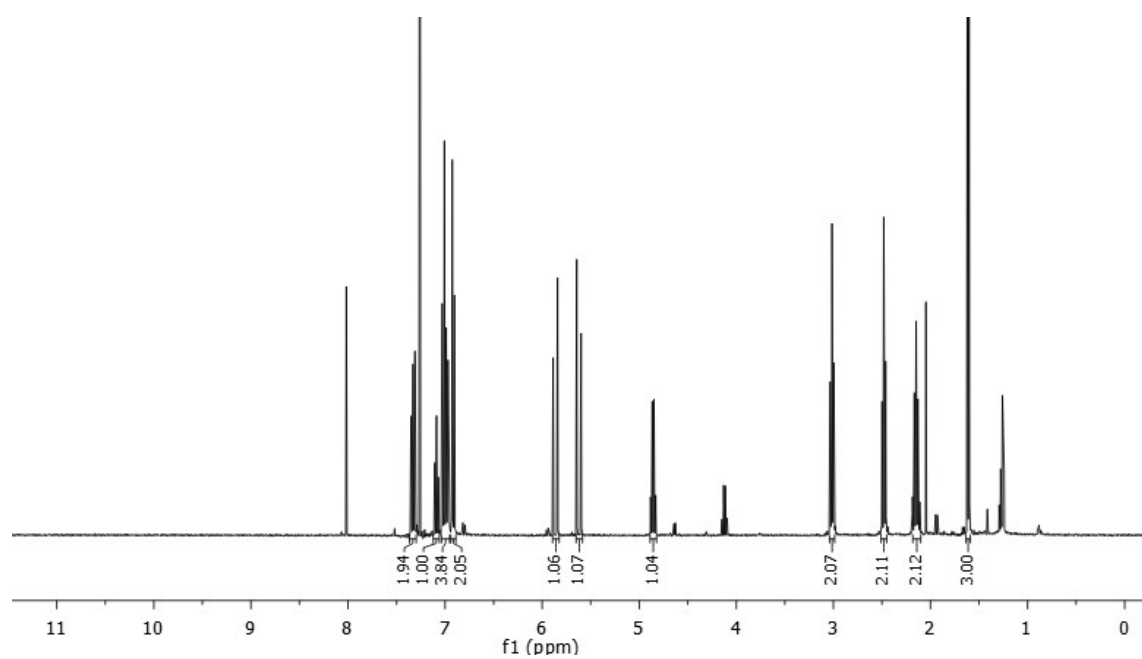

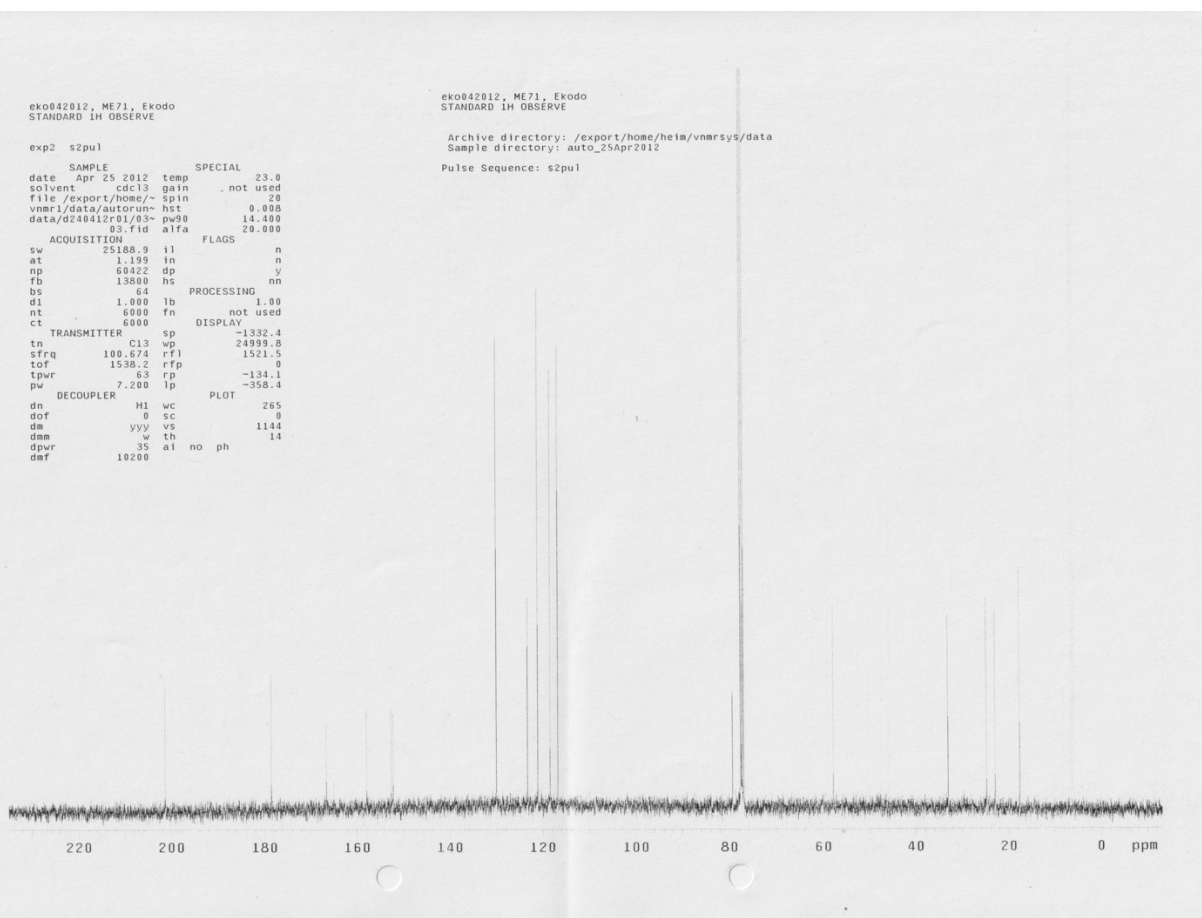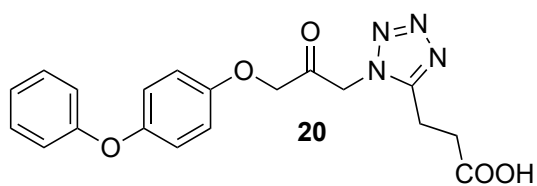

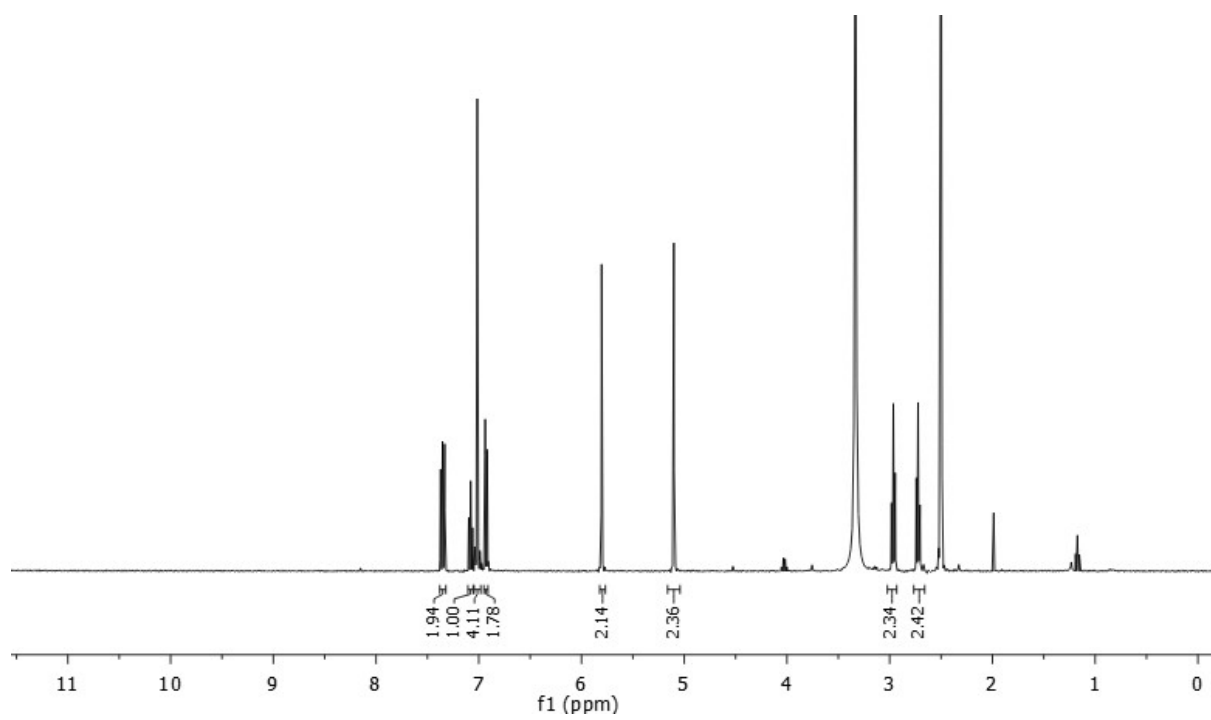

eko872012, E662, Ekodo  
STANDARD 1H OBSERVE

Automation directory: /export/home/vnmr1/data/autorundata/d250712r01  
File: 0194

Pulse Sequence: s2pul  
Solvent: dms  
Temp: 23.0 C / 296.1 K  
Sample #1  
File: 0103  
Mercury-400BB "m400"

Relax. delay 1.000 sec  
Pulse 45.0 degrees  
Acq. time 1.195 sec  
Width 25186.3 Hz  
10000 repetitions  
OBSERVE C13, 100.637820 MHz  
DECOUPLE H1, 400.3350112 MHz  
Power 35 dB  
continuously on  
VOLTAGE-16 modulated  
DATA PROCESSING  
Line broadening 1.0 Hz  
FT size 65536  
Total time 6 hr, 21 min, 40 sec

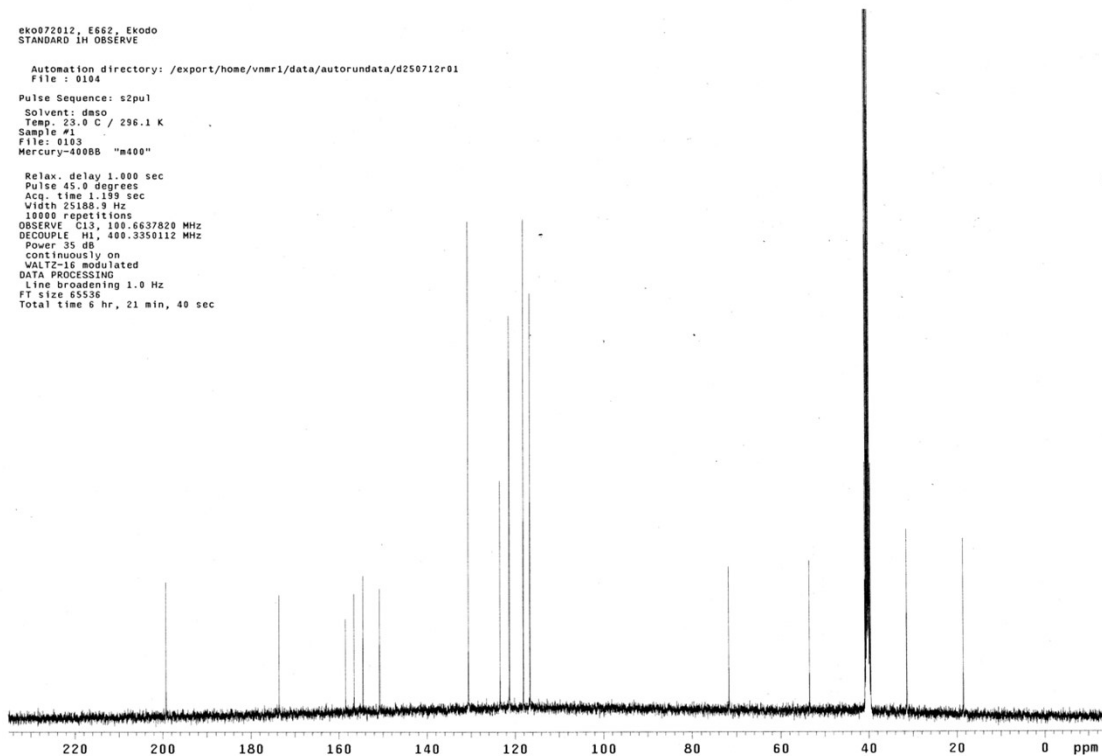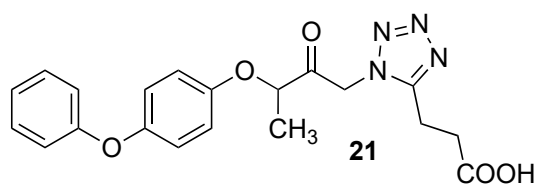

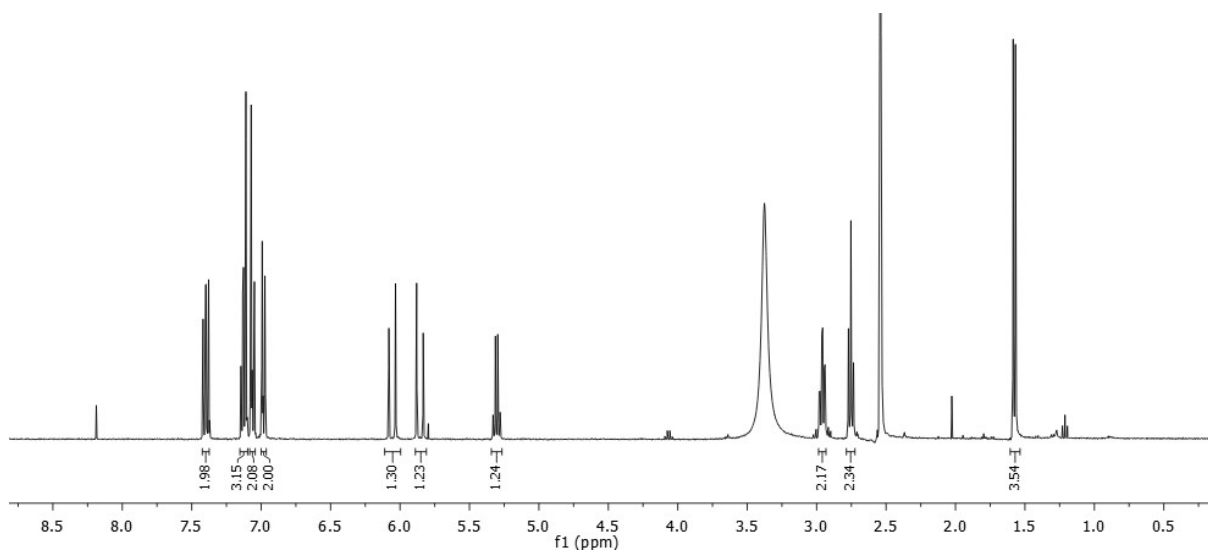

eko042012, ME59, Ekodo  
STANDARD 1H OBSERVE

Automation directory: /export/home/vnmr1/data/autorundata/d240412r01  
File : 0104

Pulse Sequence: s2pul  
Solvent: dmsd  
Temp. 23.0 C / 296.1 K  
Sample #1  
File: 0103  
Mercury-400BB "m400"

Relax. delay 1.000 sec  
Pulse 45.0 degrees  
Acq. time 1.199 sec  
Width 25166.9 Hz  
6000 repetitions  
OBSERVE C13, 100.6637820 MHz  
DECOUPLE H1, 400.3350112 MHz  
Power 35 dB  
Continuously on  
WALTZ-16 modulated  
DATA PROCESSING  
Line broadening 1.0 Hz  
FT size 65536  
Total time 3 hr, 48 min, 59 sec

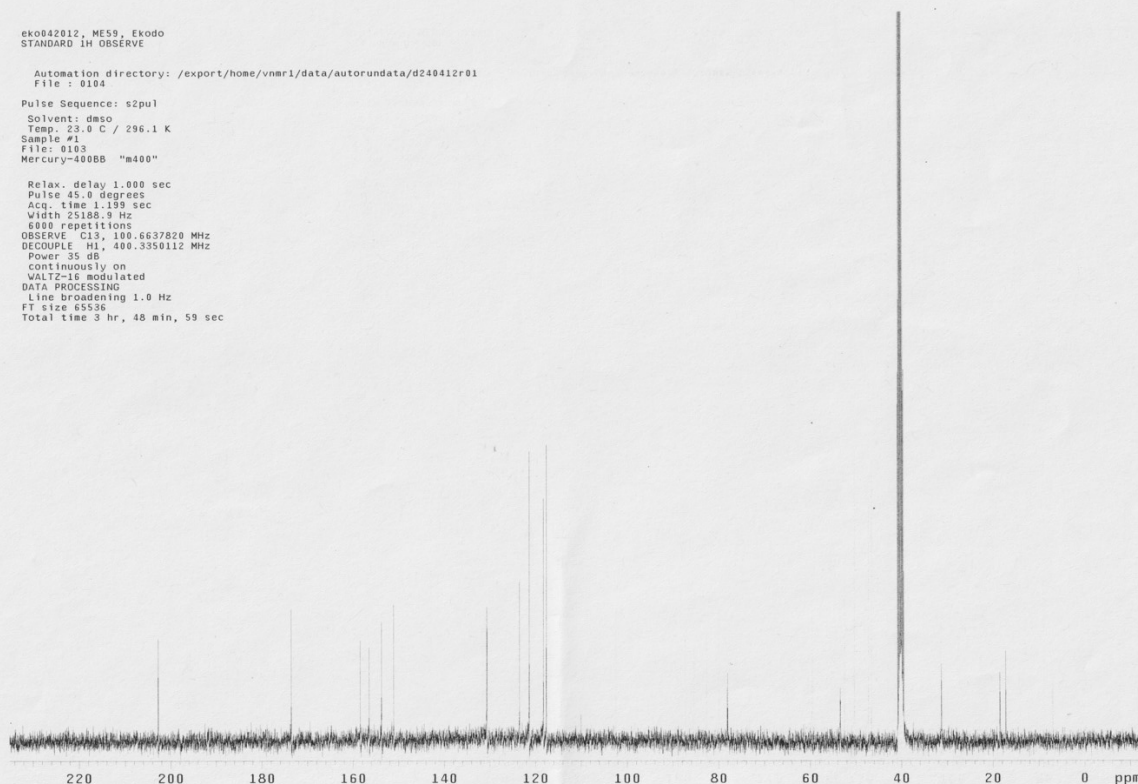

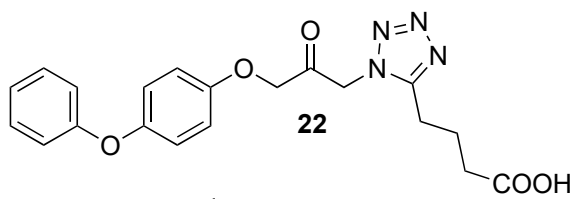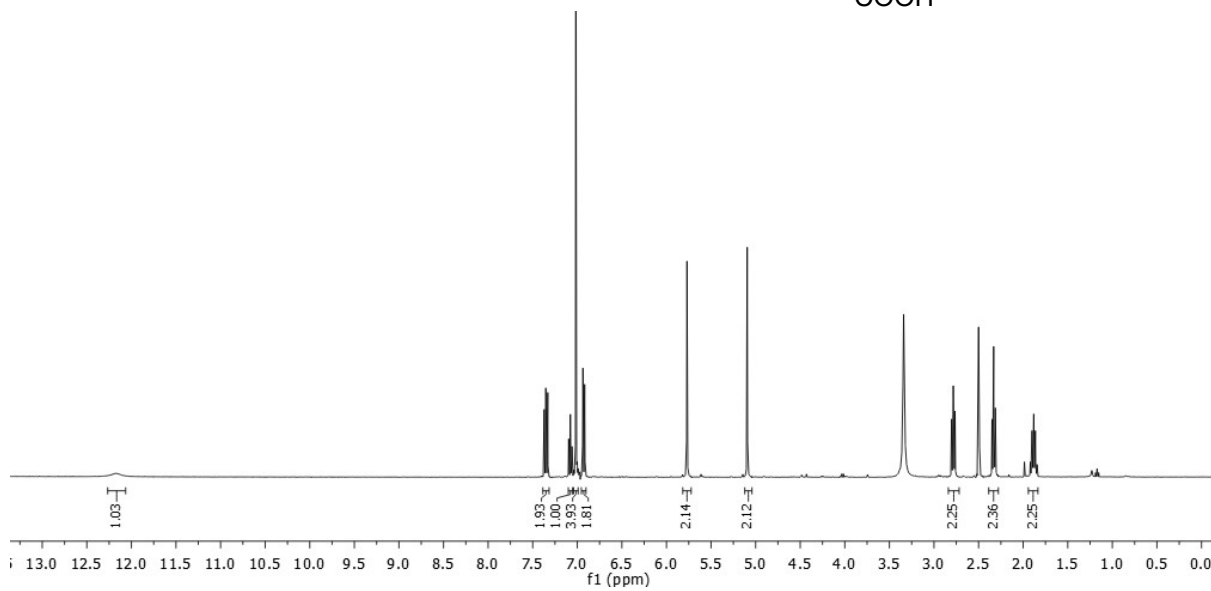

Sample Name:  
eko\_792  
Data Collected on:  
Agilent-MMR-vnmr600  
Archive directory:  
/home/vnmr1/vnmr5s/data/20140725  
Sample directory:  
eko\_792\_20140725\_01  
FidFile: eko\_792\_CARBON\_01

Pulse Sequence: CARBON (s2pul)  
Solvent: dmsc  
Data collected on: Jul 25 2014

Temp. 26.0 C / 299.1 K  
Sample #7, Operator: vnmr1

Relax. delay 1.000 sec  
Pulse 45.0 degrees  
Acq. time 0.865 sec  
Width 37878.8 Hz  
5000 repetitions  
OBSERVE C13, 150.8170790 MHz  
DECOUPLE H1, 599.7920585 MHz  
Power 33 dB  
continuously on  
WALTZ-16 modulated  
DATA PROCESSING  
Line broadening 0.5 Hz  
FT size 65536  
Total time 2 hr, 35 min

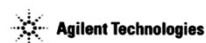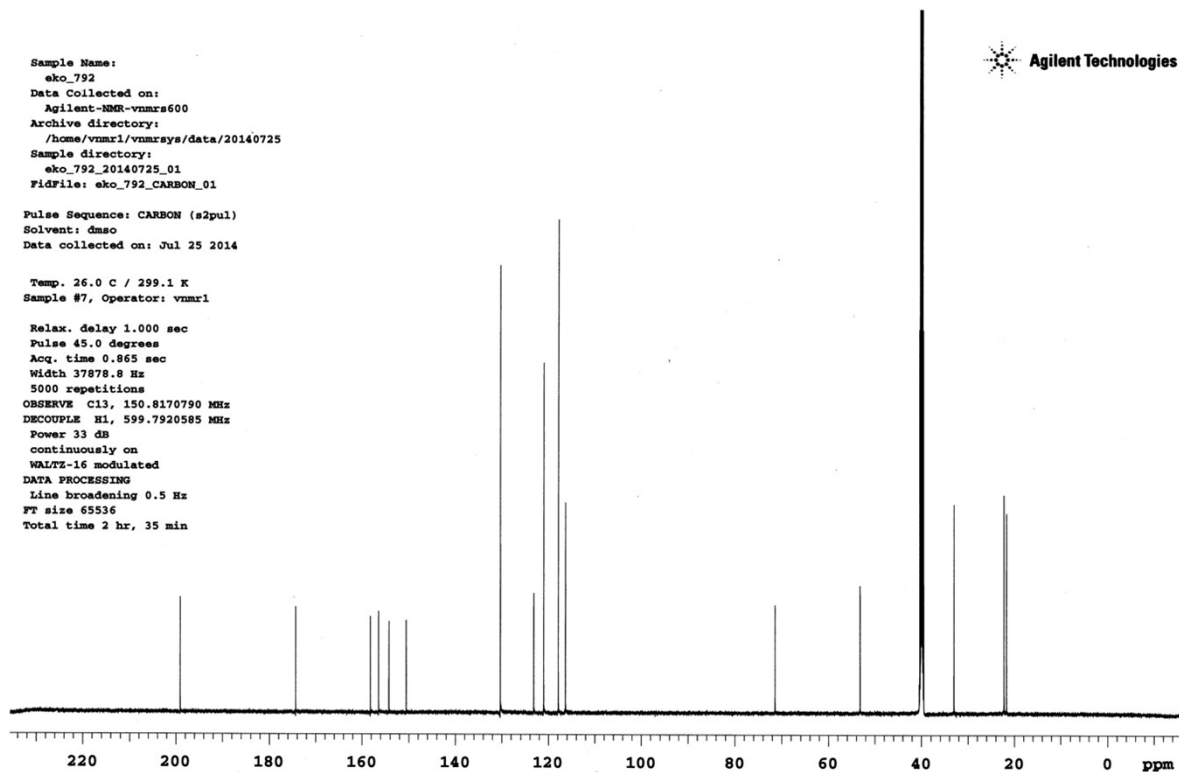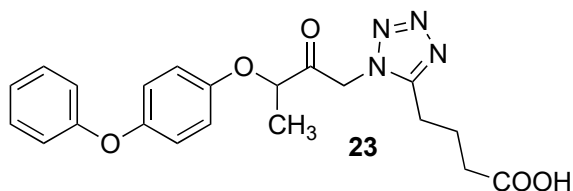

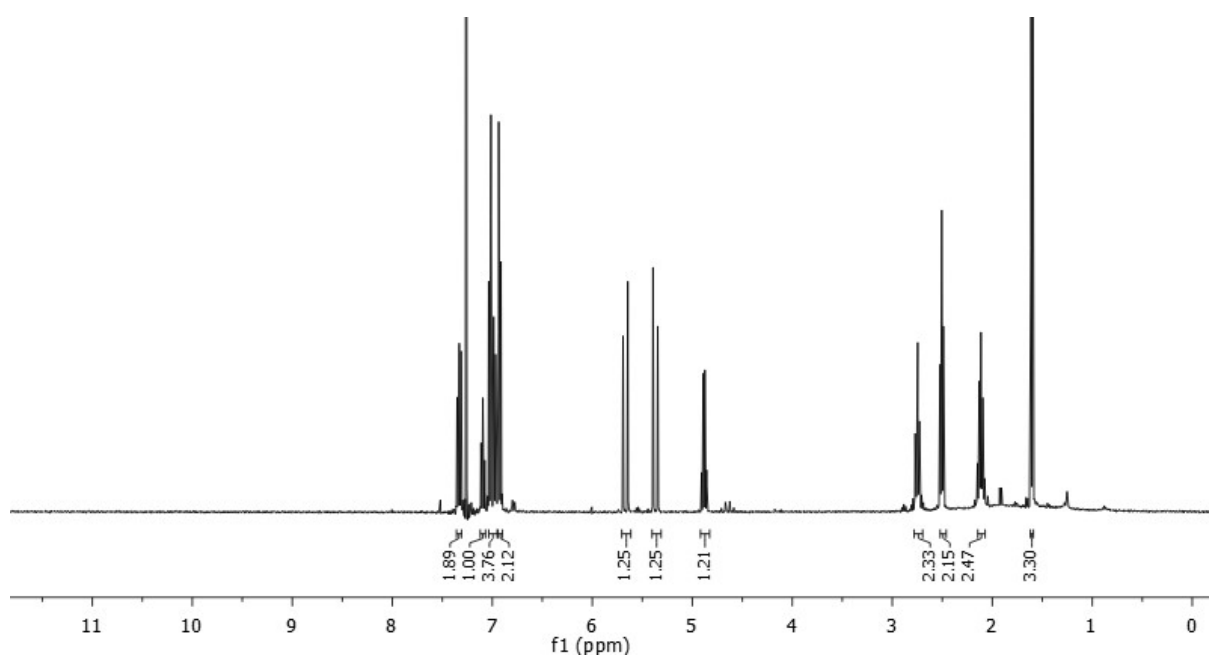

eko072012, E712, Ekodo  
STANDARD 1H OBSERVE

Automation directory: /export/home/vnmr1/data/autorundata/d270712r01  
File : 0104

Pulse Sequence: s2pu1  
Solvent: dms0  
Temp. 23.0 C / 296.1 K  
Sample #1  
File: 0103  
Mercury-400BB "m400"

Relax. delay 1.000 sec  
Pulse 45.0 degrees  
Acq. time 1.199 sec  
Width 25186.8 Hz  
7000 repetitions  
OBSERVE C13, 100.627820 MHz  
DECOUPLE H1, 400.3350112 MHz  
Power 35 dB  
continuously on  
VAT2-is modulated  
DATA PROCESSING  
Line broadening 1.0 Hz  
FT size 65536  
Total time 4 hr, 27 min, 10 sec

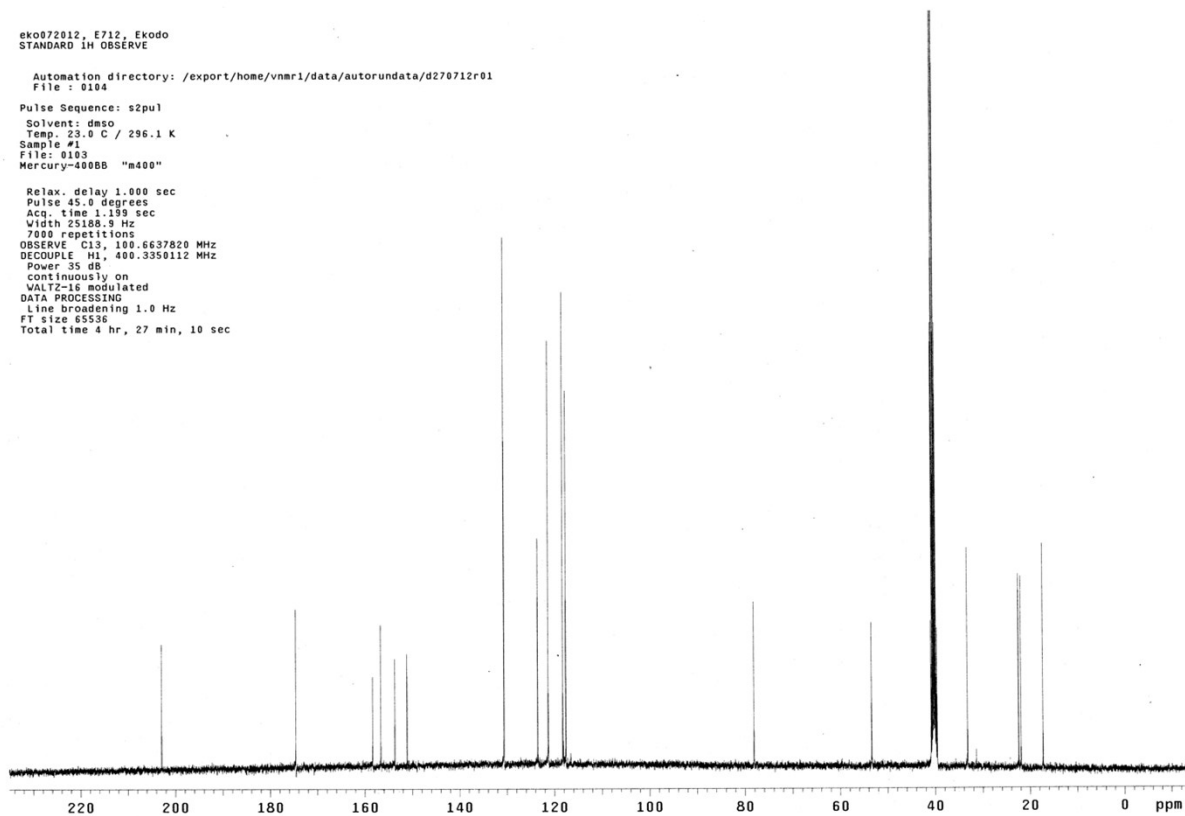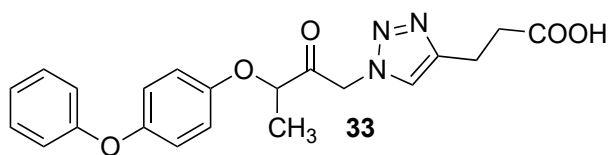

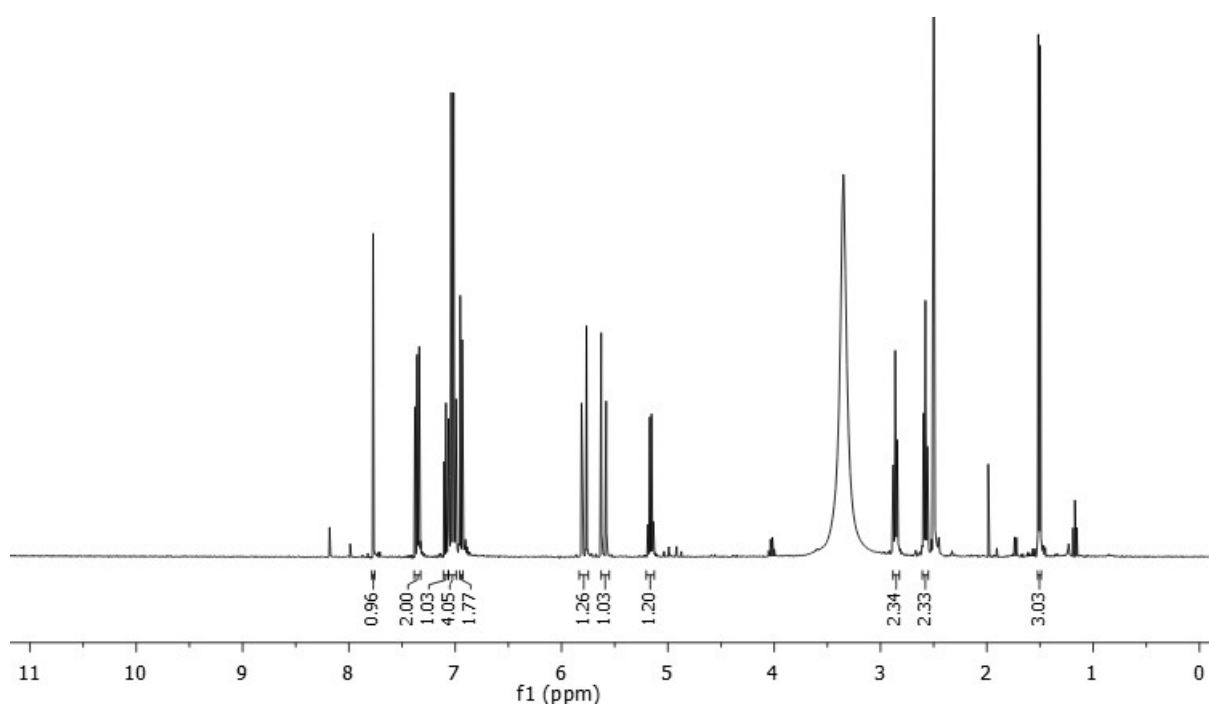

ek08ME93, Ekodo  
STANDARD 1H OBSERVE

Automation directory: /export/home/vnmr1/data/autorundata/d060812r02  
File : 0204

Pulse Sequence: s2pul  
Solvent: dmsc  
Temp. 23.0 C / 296.1 K  
Sample #2  
File: 0203  
Mercury-400BB "m400"

Relax. delay 1.000 sec  
Pulse 45.0 degrees  
Acq. time 1.199 sec  
Width 25180.9 Hz  
6000 repetitions  
OBSERVE C13, 100.6637820 MHz  
DECOUPLE H1, 400.3350112 MHz  
Power 35 dB  
continuously on  
WALTZ-16 modulated  
DATA PROCESSING  
Line broadening 1.0 Hz  
FT size 65536  
Total time 3 hr, 48 min, 59 sec

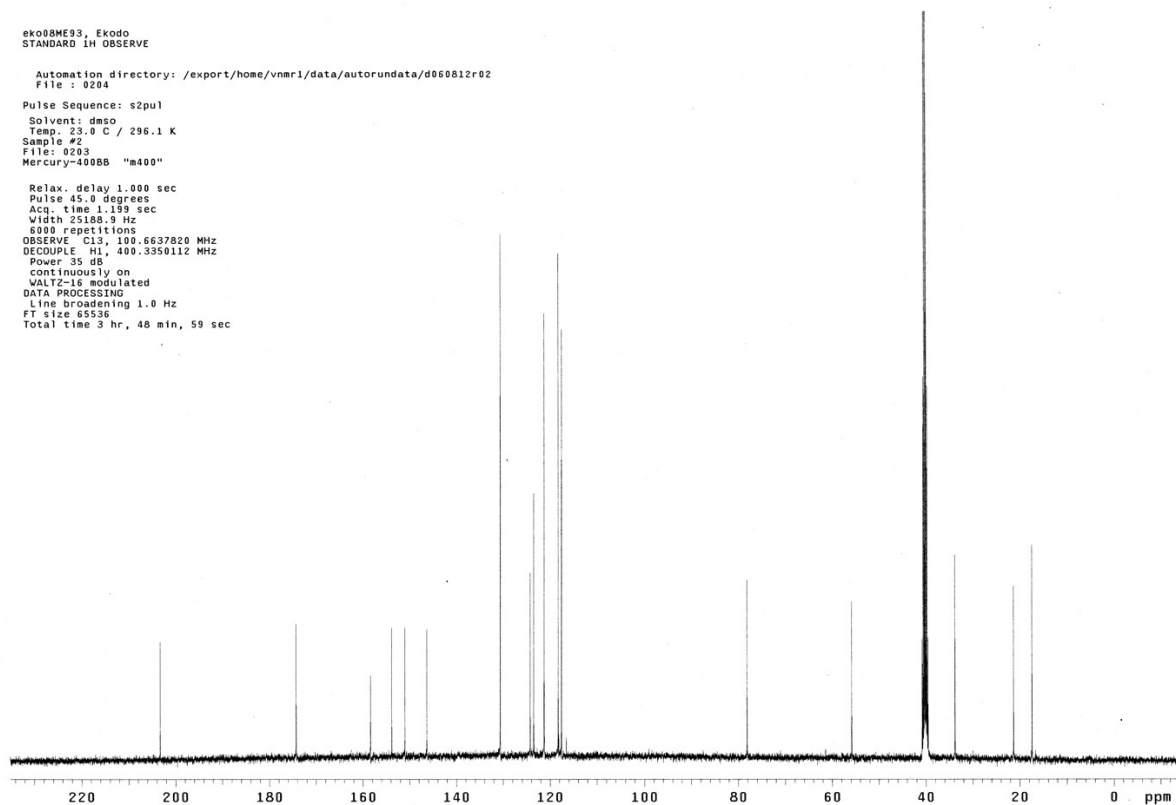

Supplement: d3md00224a1.pdf [file d3md00224a1.pdf]
